# Supplementary material for: Time-dependent density functional theory (TDDFT) modelling of Pechmann dyes: from accurate absorption maximum prediction to virtual dye screening
Source: Royal Society of Chemistry journal article supplement (doi:10.1039/c2ob25806d), 2012-01-01
Supplement: c2ob25806d.pdf [file c2ob25806d.pdf]

# **Time-dependent density functional theory (TDDFT) modelling of Pechmann dyes: from accurate absorption maximum prediction to virtual dye screening**

Eric Assen B. Kantchev<sup>[a]\*</sup>, Tyler B. Norsten<sup>[a],[b]\*</sup> Michael B. Sullivan<sup>[c]</sup>

<sup>a</sup>*Institute of Materials Research and Engineering, A\*STAR, 3 Research Link, Singapore  
117602*

<sup>b</sup>*Current address: Linxens, 23 Changi North Way, Singapore 498810*

<sup>c</sup>*Institute of High Performance Computing, A\*STAR, 1 Fusionopolis Way #16-16, The  
Connexis, Singapore 138632*

*kantcheveab@imre.a-star.edu.sg; norstent@imre.a-star.edu.sg*

**Structure plots, cartesian coordinates, SCF convergence and thermochemistry  
data for structures 1-12 at SMD (CH<sub>2</sub>Cl<sub>2</sub>)/B3LYP/DGTZVP level of theory**

**Structure 1**

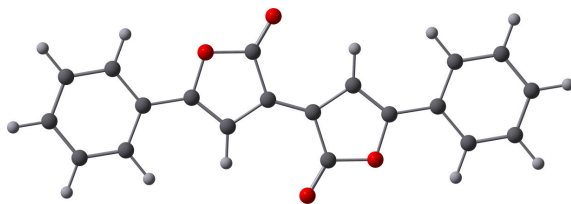

| Center Number | Atomic Number | Atomic Type | Coordinates (Angstroms) |           |           |
|---------------|---------------|-------------|-------------------------|-----------|-----------|
|               |               |             | X                       | Y         | Z         |
| 1             | 6             | 0           | -1.106403               | 1.598608  | -0.000004 |
| 2             | 6             | 0           | -0.661418               | 0.186390  | -0.000008 |
| 3             | 6             | 0           | -1.850354               | -0.596711 | -0.000009 |
| 4             | 6             | 0           | -2.913453               | 0.255891  | -0.000002 |
| 5             | 8             | 0           | -2.495568               | 1.585372  | 0.000004  |
| 6             | 1             | 0           | -1.899431               | -1.671710 | -0.000012 |
| 7             | 6             | 0           | 0.661418                | -0.186389 | -0.000010 |
| 8             | 6             | 0           | 1.106403                | -1.598607 | -0.000018 |
| 9             | 6             | 0           | 1.850354                | 0.596711  | -0.000011 |
| 10            | 8             | 0           | 2.495568                | -1.585372 | -0.000005 |
| 11            | 6             | 0           | 2.913453                | -0.255891 | -0.000006 |
| 12            | 1             | 0           | 1.899431                | 1.671710  | -0.000010 |
| 13            | 8             | 0           | -0.490763               | 2.638005  | 0.000006  |
| 14            | 8             | 0           | 0.490763                | -2.638004 | -0.000003 |
| 15            | 6             | 0           | 4.343215                | -0.029785 | -0.000001 |
| 16            | 6             | 0           | 4.853211                | 1.281828  | 0.000000  |
| 17            | 6             | 0           | 5.241289                | -1.111076 | 0.000004  |
| 18            | 6             | 0           | 6.221948                | 1.500486  | 0.000005  |
| 19            | 1             | 0           | 4.175967                | 2.126604  | -0.000004 |
| 20            | 6             | 0           | 6.611809                | -0.881742 | 0.000009  |
| 21            | 1             | 0           | 4.862344                | -2.124167 | 0.000003  |
| 22            | 6             | 0           | 7.106897                | 0.420402  | 0.000010  |
| 23            | 1             | 0           | 6.603124                | 2.514504  | 0.000006  |
| 24            | 1             | 0           | 7.295388                | -1.722305 | 0.000013  |
| 25            | 1             | 0           | 8.176095                | 0.595727  | 0.000014  |
| 26            | 6             | 0           | -4.343215               | 0.029785  | 0.000002  |
| 27            | 6             | 0           | -5.241289               | 1.111076  | 0.000010  |
| 28            | 6             | 0           | -4.853211               | -1.281828 | -0.000002 |
| 29            | 6             | 0           | -6.611809               | 0.881742  | 0.000013  |
| 30            | 1             | 0           | -4.862344               | 2.124166  | 0.000013  |
| 31            | 6             | 0           | -6.221948               | -1.500487 | 0.000001  |
| 32            | 1             | 0           | -4.175967               | -2.126605 | -0.000008 |
| 33            | 6             | 0           | -7.106897               | -0.420403 | 0.000009  |
| 34            | 1             | 0           | -7.295388               | 1.722305  | 0.000019  |
| 35            | 1             | 0           | -6.603124               | -2.514504 | -0.000002 |
| 36            | 1             | 0           | -8.176095               | -0.595728 | 0.000011  |

-----  
SCF Done: E(RB3LYP) = -1070.59391109 A.U. after 1 cycles  
Convgt = 0.4098D-08 -V/T = 2.0060  
Zero-point correction= 0.267242 (Hartree/Particle)  
Thermal correction to Energy= 0.285637  
Thermal correction to Enthalpy= 0.286581  
Thermal correction to Gibbs Free Energy= 0.218393  
Sum of electronic and zero-point Energies= -1070.326669  
Sum of electronic and thermal Energies= -1070.308275  
Sum of electronic and thermal Enthalpies= -1070.307330  
Sum of electronic and thermal Free Energies= -1070.375518  
-----

**Structure 2**

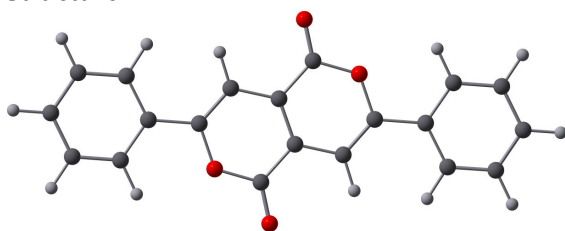

| Center Number | Atomic Number | Atomic Type | Coordinates (Angstroms) |           |           |
|---------------|---------------|-------------|-------------------------|-----------|-----------|
|               |               |             | X                       | Y         | Z         |
| 1             | 6             | 0           | -0.742112               | 1.741207  | -0.000286 |
| 2             | 6             | 0           | 0.231441                | 0.651197  | -0.000090 |
| 3             | 6             | 0           | -0.231441               | -0.651197 | -0.000058 |
| 4             | 6             | 0           | -1.619082               | -0.948145 | -0.000094 |
| 5             | 6             | 0           | -2.518538               | 0.068693  | -0.000076 |
| 6             | 1             | 0           | 1.938845                | 1.977949  | -0.000049 |
| 7             | 6             | 0           | 1.619082                | 0.948145  | -0.000016 |
| 8             | 6             | 0           | 0.742112                | -1.741207 | 0.000103  |
| 9             | 1             | 0           | -1.938845               | -1.977949 | -0.000055 |
| 10            | 6             | 0           | 2.518538                | -0.068693 | 0.000018  |
| 11            | 8             | 0           | 2.072203                | -1.368076 | 0.000036  |
| 12            | 8             | 0           | -2.072203               | 1.368076  | -0.000114 |
| 13            | 8             | 0           | -0.487641               | 2.928304  | 0.000066  |
| 14            | 8             | 0           | 0.487641                | -2.928304 | -0.000081 |
| 15            | 6             | 0           | -3.982030               | -0.033013 | -0.000010 |
| 16            | 6             | 0           | -4.777449               | 1.124380  | 0.000051  |
| 17            | 6             | 0           | -4.617534               | -1.286837 | -0.000007 |
| 18            | 6             | 0           | -6.164400               | 1.027739  | 0.000113  |
| 19            | 1             | 0           | -4.309597               | 2.098899  | 0.000050  |
| 20            | 6             | 0           | -6.002520               | -1.375296 | 0.000055  |
| 21            | 1             | 0           | -4.035226               | -2.198917 | -0.000056 |
| 22            | 6             | 0           | -6.783419               | -0.219409 | 0.000116  |
| 23            | 1             | 0           | -6.761523               | 1.931910  | 0.000161  |
| 24            | 1             | 0           | -6.474727               | -2.350445 | 0.000055  |
| 25            | 6             | 0           | 3.982030                | 0.033013  | 0.000026  |
| 26            | 6             | 0           | 4.777449                | -1.124380 | 0.000012  |
| 27            | 6             | 0           | 4.617534                | 1.286837  | 0.000053  |
| 28            | 6             | 0           | 6.164400                | -1.027739 | 0.000023  |
| 29            | 1             | 0           | 4.309597                | -2.098899 | -0.000007 |
| 30            | 6             | 0           | 6.002520                | 1.375296  | 0.000063  |
| 31            | 1             | 0           | 4.035226                | 2.198917  | 0.000069  |
| 32            | 6             | 0           | 6.783419                | 0.219409  | 0.000048  |
| 33            | 1             | 0           | 6.761523                | -1.931911 | 0.000009  |
| 34            | 1             | 0           | 6.474727                | 2.350445  | 0.000085  |
| 35            | 1             | 0           | 7.864488                | 0.292545  | 0.000057  |
| 36            | 1             | 0           | -7.864488               | -0.292546 | 0.000163  |

```

SCF Done: E(RB3LYP) = -1070.60549536 A.U. after 1 cycles
              Conv = 0.7919D-08 -V/T = 2.0060
Zero-point correction= 0.268441 (Hartree/Particle)
Thermal correction to Energy= 0.286471
Thermal correction to Enthalpy= 0.287415
Thermal correction to Gibbs Free Energy= 0.220851
Sum of electronic and zero-point Energies= -1070.337054
Sum of electronic and thermal Energies= -1070.319025
Sum of electronic and thermal Enthalpies= -1070.318081
Sum of electronic and thermal Free Energies= -1070.384644
    
```

**Structure 3**

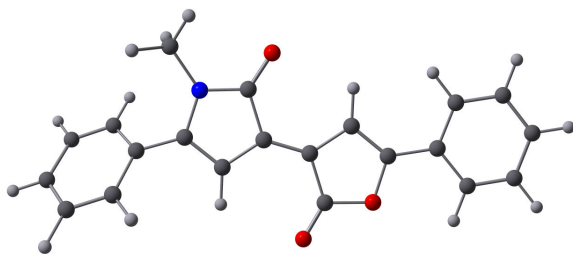

| Center Number | Atomic Number | Atomic Type | Coordinates (Angstroms) |           |           |
|---------------|---------------|-------------|-------------------------|-----------|-----------|
|               |               |             | X                       | Y         | Z         |
| 1             | 6             | 0           | 0.952942                | 1.574977  | -0.140066 |
| 2             | 6             | 0           | 0.515592                | 0.141754  | -0.079106 |
| 3             | 6             | 0           | 1.705504                | -0.635428 | -0.051889 |
| 4             | 6             | 0           | 2.783379                | 0.216079  | -0.061903 |
| 5             | 1             | 0           | 1.761066                | -1.706353 | 0.036710  |
| 6             | 6             | 0           | -0.802343               | -0.244019 | -0.039648 |
| 7             | 6             | 0           | -1.238006               | -1.656192 | 0.018241  |
| 8             | 6             | 0           | -2.000161               | 0.532185  | -0.039335 |
| 9             | 6             | 0           | -3.055888               | -0.324075 | 0.015572  |
| 10            | 1             | 0           | -2.051924               | 1.606094  | -0.074705 |
| 11            | 8             | 0           | 0.267738                | 2.589476  | -0.226588 |
| 12            | 8             | 0           | -0.619566               | -2.695519 | 0.036776  |
| 13            | 7             | 0           | 2.341196                | 1.550754  | -0.109626 |
| 14            | 6             | 0           | 3.131076                | 2.752604  | -0.353592 |
| 15            | 1             | 0           | 2.491040                | 3.475817  | -0.857077 |
| 16            | 1             | 0           | 3.487027                | 3.197939  | 0.577540  |
| 17            | 1             | 0           | 3.981097                | 2.521764  | -0.993270 |
| 18            | 6             | 0           | 4.193643                | -0.166147 | 0.012669  |
| 19            | 6             | 0           | 5.128772                | 0.571079  | 0.757893  |
| 20            | 6             | 0           | 4.622309                | -1.338093 | -0.634212 |
| 21            | 6             | 0           | 6.448803                | 0.145318  | 0.852689  |
| 22            | 1             | 0           | 4.820283                | 1.460561  | 1.290498  |
| 23            | 6             | 0           | 5.944228                | -1.754347 | -0.541805 |
| 24            | 1             | 0           | 3.917605                | -1.910953 | -1.224030 |
| 25            | 6             | 0           | 6.863047                | -1.014475 | 0.201018  |
| 26            | 1             | 0           | 7.154425                | 0.718778  | 1.442122  |
| 27            | 1             | 0           | 6.259019                | -2.655063 | -1.055239 |
| 28            | 1             | 0           | 7.894190                | -1.339750 | 0.271752  |
| 29            | 6             | 0           | -4.488279               | -0.106303 | 0.043255  |
| 30            | 6             | 0           | -5.379888               | -1.189967 | 0.115430  |
| 31            | 6             | 0           | -5.007568               | 1.200735  | -0.000342 |
| 32            | 6             | 0           | -6.751927               | -0.968162 | 0.142091  |
| 33            | 1             | 0           | -4.994654               | -2.200161 | 0.150018  |
| 34            | 6             | 0           | -6.377423               | 1.412363  | 0.026905  |
| 35            | 1             | 0           | -4.335982               | 2.048249  | -0.056615 |
| 36            | 6             | 0           | -7.256113               | 0.329530  | 0.098274  |
| 37            | 1             | 0           | -7.429304               | -1.812030 | 0.197538  |
| 38            | 1             | 0           | -6.764313               | 2.423754  | -0.007664 |
| 39            | 1             | 0           | -8.326038               | 0.499183  | 0.118888  |
| 40            | 8             | 0           | -2.628434               | -1.651408 | 0.052073  |

```

SCF Done: E(RB3LYP) = -1090.04400310 A.U. after 1 cycles
           Convrg = 0.4718D-08 -V/T = 2.0061
Zero-point correction= 0.307371 (Hartree/Particle)
Thermal correction to Energy= 0.327649
Thermal correction to Enthalpy= 0.328593
Thermal correction to Gibbs Free Energy= 0.256127
Sum of electronic and zero-point Energies= -1089.736632
Sum of electronic and thermal Energies= -1089.716354
Sum of electronic and thermal Enthalpies= -1089.715410
    
```

Sum of electronic and thermal Free Energies= -1089.787876

**Structure 4**

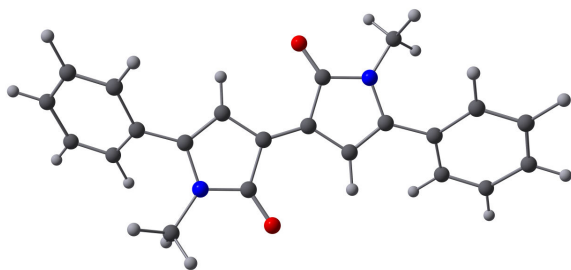

| Center Number | Atomic Number | Atomic Type | Coordinates (Angstroms) |           |           |
|---------------|---------------|-------------|-------------------------|-----------|-----------|
|               |               |             | X                       | Y         | Z         |
| 1             | 6             | 0           | -1.085683               | -1.627732 | -0.158581 |
| 2             | 6             | 0           | -0.656038               | -0.197517 | -0.040593 |
| 3             | 6             | 0           | -1.854783               | 0.574871  | -0.015802 |
| 4             | 6             | 0           | -2.926537               | -0.277243 | -0.081736 |
| 5             | 1             | 0           | -1.912447               | 1.641757  | 0.108676  |
| 6             | 6             | 0           | 0.656044                | 0.197553  | 0.040409  |
| 7             | 6             | 0           | 1.085689                | 1.627771  | 0.158373  |
| 8             | 6             | 0           | 1.854788                | -0.574835 | 0.015625  |
| 9             | 6             | 0           | 2.926544                | 0.277271  | 0.081646  |
| 10            | 1             | 0           | 1.912451                | -1.641720 | -0.108858 |
| 11            | 8             | 0           | -0.397784               | -2.641372 | -0.259603 |
| 12            | 8             | 0           | 0.397790                | 2.641402  | 0.259483  |
| 13            | 7             | 0           | -2.474483               | -1.609601 | -0.162557 |
| 14            | 7             | 0           | 2.474488                | 1.609626  | 0.162515  |
| 15            | 6             | 0           | -3.251450               | -2.806234 | -0.460972 |
| 16            | 1             | 0           | -2.596607               | -3.510210 | -0.972895 |
| 17            | 1             | 0           | -3.625423               | -3.283745 | 0.447194  |
| 18            | 1             | 0           | -4.089464               | -2.560934 | -1.111250 |
| 19            | 6             | 0           | 3.251424                | 2.806253  | 0.461037  |
| 20            | 1             | 0           | 4.089388                | 2.560937  | 1.111372  |
| 21            | 1             | 0           | 3.625463                | 3.283798  | -0.447085 |
| 22            | 1             | 0           | 2.596536                | 3.510206  | 0.972933  |
| 23            | 6             | 0           | -4.341535               | 0.095616  | -0.029064 |
| 24            | 6             | 0           | -5.292524               | -0.669075 | 0.666804  |
| 25            | 6             | 0           | -4.760797               | 1.286592  | -0.646700 |
| 26            | 6             | 0           | -6.617079               | -0.252288 | 0.741633  |
| 27            | 1             | 0           | -4.994668               | -1.575631 | 1.176459  |
| 28            | 6             | 0           | -6.086324               | 1.695680  | -0.572582 |
| 29            | 1             | 0           | -4.043969               | 1.881418  | -1.199049 |
| 30            | 6             | 0           | -7.020800               | 0.927762  | 0.120577  |
| 31            | 1             | 0           | -7.334647               | -0.849167 | 1.292301  |
| 32            | 1             | 0           | -6.391764               | 2.612703  | -1.062481 |
| 33            | 1             | 0           | -8.054955               | 1.246482  | 0.176121  |
| 34            | 6             | 0           | 4.341540                | -0.095611 | 0.029080  |
| 35            | 6             | 0           | 5.292614                | 0.669082  | -0.666670 |
| 36            | 6             | 0           | 4.760715                | -1.286631 | 0.646693  |
| 37            | 6             | 0           | 6.617164                | 0.252258  | -0.741403 |
| 38            | 1             | 0           | 4.994836                | 1.575669  | -1.176312 |
| 39            | 6             | 0           | 6.086235                | -1.695756 | 0.572671  |
| 40            | 1             | 0           | 4.043823                | -1.881463 | 1.198950  |
| 41            | 6             | 0           | 7.020796                | -0.927833 | -0.120369 |
| 42            | 1             | 0           | 7.334796                | 0.849142  | -1.291982 |
| 43            | 1             | 0           | 6.391604                | -2.612812 | 1.062551  |
| 44            | 1             | 0           | 8.054946                | -1.246582 | -0.175840 |

SCF Done: E(RB3LYP) = -1109.49276409 A.U. after 1 cycles

```
Convg = 0.6346D-08 -V/T = 2.0062
Zero-point correction= 0.347613 (Hartree/Particle)
Thermal correction to Energy= 0.369778
Thermal correction to Enthalpy= 0.370722
Thermal correction to Gibbs Free Energy= 0.294439
Sum of electronic and zero-point Energies= -1109.145152
Sum of electronic and thermal Energies= -1109.122987
Sum of electronic and thermal Enthalpies= -1109.122042
Sum of electronic and thermal Free Energies= -1109.198325
```

### Structure 5

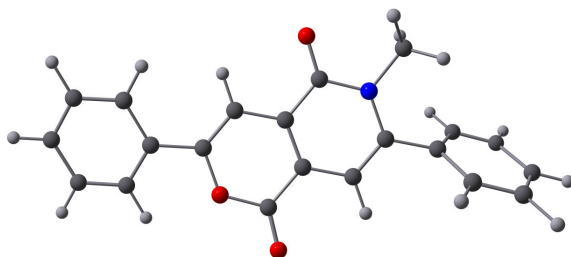

| Center Number | Atomic Number | Atomic Type | Coordinates (Angstroms) |           |           |
|---------------|---------------|-------------|-------------------------|-----------|-----------|
|               |               |             | X                       | Y         | Z         |
| 1             | 6             | 0           | 0.840927                | -1.781243 | -0.026872 |
| 2             | 6             | 0           | -0.109210               | -0.671073 | -0.053936 |
| 3             | 6             | 0           | 0.371635                | 0.627055  | -0.053049 |
| 4             | 6             | 0           | 1.770511                | 0.887080  | -0.028047 |
| 5             | 6             | 0           | 2.646574                | -0.145834 | -0.011868 |
| 6             | 1             | 0           | -1.854965               | -1.949370 | 0.000688  |
| 7             | 6             | 0           | -1.497263               | -0.932828 | -0.054916 |
| 8             | 6             | 0           | -0.566582               | 1.746230  | -0.076482 |
| 9             | 1             | 0           | 2.114695                | 1.908948  | -0.008449 |
| 10            | 6             | 0           | -2.389117               | 0.103600  | -0.075319 |
| 11            | 8             | 0           | 0.561750                | -2.964167 | -0.019355 |
| 12            | 8             | 0           | -0.212078               | 2.931807  | -0.076479 |
| 13            | 7             | 0           | -1.926450               | 1.411969  | -0.125426 |
| 14            | 6             | 0           | -2.835462               | 2.558601  | -0.294155 |
| 15            | 1             | 0           | -2.403071               | 3.235251  | -1.028337 |
| 16            | 1             | 0           | -3.802801               | 2.210897  | -0.638181 |
| 17            | 1             | 0           | -2.949423               | 3.102301  | 0.644777  |
| 18            | 6             | 0           | -3.848177               | -0.171611 | -0.001575 |
| 19            | 6             | 0           | -4.626976               | 0.319499  | 1.054857  |
| 20            | 6             | 0           | -4.445894               | -1.001642 | -0.956810 |
| 21            | 6             | 0           | -5.974141               | -0.012177 | 1.148872  |
| 22            | 1             | 0           | -4.174148               | 0.947304  | 1.813112  |
| 23            | 6             | 0           | -5.796805               | -1.326366 | -0.863100 |
| 24            | 1             | 0           | -3.853195               | -1.385548 | -1.778355 |
| 25            | 6             | 0           | -6.563901               | -0.833442 | 0.188833  |
| 26            | 1             | 0           | -6.562499               | 0.365568  | 1.976786  |
| 27            | 1             | 0           | -6.247674               | -1.964283 | -1.614114 |
| 28            | 1             | 0           | -7.614375               | -1.088915 | 0.263015  |
| 29            | 6             | 0           | 4.112262                | -0.069557 | 0.022968  |
| 30            | 6             | 0           | 4.880626                | -1.209630 | 0.306024  |
| 31            | 6             | 0           | 4.773893                | 1.145082  | -0.222689 |
| 32            | 6             | 0           | 6.268393                | -1.131895 | 0.350813  |
| 33            | 1             | 0           | 4.389786                | -2.154282 | 0.495517  |
| 34            | 6             | 0           | 6.159574                | 1.215515  | -0.176108 |
| 35            | 1             | 0           | 4.208483                | 2.036328  | -0.462549 |
| 36            | 6             | 0           | 6.914121                | 0.078180  | 0.111636  |
| 37            | 1             | 0           | 6.845425                | -2.021689 | 0.573612  |
| 38            | 1             | 0           | 6.653655                | 2.159868  | -0.371649 |

|    |   |   |          |           |           |
|----|---|---|----------|-----------|-----------|
| 39 | 1 | 0 | 7.995668 | 0.135849  | 0.144633  |
| 40 | 8 | 0 | 2.179037 | -1.440549 | -0.012539 |

```

-----
SCF Done: E(RB3LYP) = -1090.06475538 A.U. after 1 cycles
          Convgt = 0.4191D-08 -V/T = 2.0061
Zero-point correction= 0.309057 (Hartree/Particle)
Thermal correction to Energy= 0.328740
Thermal correction to Enthalpy= 0.329684
Thermal correction to Gibbs Free Energy= 0.259434
Sum of electronic and zero-point Energies= -1089.755699
Sum of electronic and thermal Energies= -1089.736015
Sum of electronic and thermal Enthalpies= -1089.735071
Sum of electronic and thermal Free Energies= -1089.805321
    
```

### Structure 6

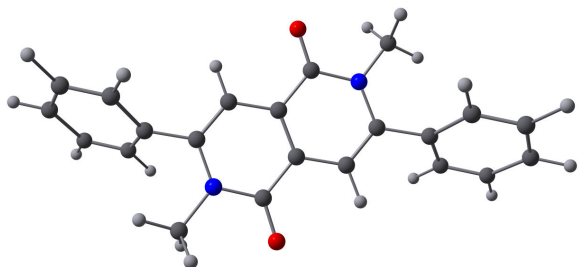

| Center Number | Atomic Number | Atomic Type | Coordinates (Angstroms) |           |           |
|---------------|---------------|-------------|-------------------------|-----------|-----------|
|               |               |             | X                       | Y         | Z         |
| 1             | 6             | 0           | -0.676352               | -1.772298 | -0.173870 |
| 2             | 6             | 0           | 0.246320                | -0.646827 | -0.037987 |
| 3             | 6             | 0           | -0.246314               | 0.646857  | 0.037764  |
| 4             | 6             | 0           | -1.642832               | 0.884435  | 0.019280  |
| 5             | 6             | 0           | -2.518509               | -0.155792 | -0.098119 |
| 6             | 1             | 0           | 2.015462                | -1.889780 | -0.141993 |
| 7             | 6             | 0           | 1.642837                | -0.884409 | -0.019448 |
| 8             | 6             | 0           | 0.676361                | 1.772332  | 0.173592  |
| 9             | 1             | 0           | -2.015455               | 1.889806  | 0.141837  |
| 10            | 6             | 0           | 2.518512                | 0.155812  | 0.098029  |
| 11            | 8             | 0           | -0.305533               | -2.951768 | -0.254072 |
| 12            | 8             | 0           | 0.305531                | 2.951779  | 0.254073  |
| 13            | 7             | 0           | 2.036986                | 1.454445  | 0.236738  |
| 14            | 7             | 0           | -2.036990               | -1.454424 | -0.236849 |
| 15            | 6             | 0           | 2.925554                | 2.591824  | 0.527085  |
| 16            | 1             | 0           | 2.455035                | 3.209607  | 1.289112  |
| 17            | 1             | 0           | 3.880689                | 2.226383  | 0.887335  |
| 18            | 1             | 0           | 3.076793                | 3.204746  | -0.362823 |
| 19            | 6             | 0           | -2.925597               | -2.591811 | -0.527042 |
| 20            | 1             | 0           | -3.076702               | -3.204717 | 0.362900  |
| 21            | 1             | 0           | -3.880787               | -2.226374 | -0.887153 |
| 22            | 1             | 0           | -2.455191               | -3.209604 | -1.289130 |
| 23            | 6             | 0           | 3.983621                | -0.089259 | 0.033580  |
| 24            | 6             | 0           | 4.775074                | 0.500073  | -0.961818 |
| 25            | 6             | 0           | 4.579352                | -0.982303 | 0.931504  |
| 26            | 6             | 0           | 6.130790                | 0.203844  | -1.051382 |
| 27            | 1             | 0           | 4.325324                | 1.178264  | -1.677356 |
| 28            | 6             | 0           | 5.938515                | -1.273018 | 0.842537  |
| 29            | 1             | 0           | 3.976883                | -1.443073 | 1.705004  |
| 30            | 6             | 0           | 6.717695                | -0.680817 | -0.147478 |
| 31            | 1             | 0           | 6.728393                | 0.659499  | -1.832175 |
| 32            | 1             | 0           | 6.386516                | -1.961802 | 1.549120  |
| 33            | 1             | 0           | 7.774878                | -0.908475 | -0.217500 |
| 34            | 6             | 0           | -3.983615               | 0.089261  | -0.033561 |

|    |   |   |           |           |           |
|----|---|---|-----------|-----------|-----------|
| 35 | 6 | 0 | -4.774990 | -0.500105 | 0.961879  |
| 36 | 6 | 0 | -4.579423 | 0.982309  | -0.931431 |
| 37 | 6 | 0 | -6.130704 | -0.203900 | 1.051542  |
| 38 | 1 | 0 | -4.325179 | -1.178306 | 1.677369  |
| 39 | 6 | 0 | -5.938584 | 1.273001  | -0.842363 |
| 40 | 1 | 0 | -3.977015 | 1.443101  | -1.704965 |
| 41 | 6 | 0 | -6.717686 | 0.680769  | 0.147695  |
| 42 | 1 | 0 | -6.728246 | -0.659580 | 1.832367  |
| 43 | 1 | 0 | -6.386646 | 1.961789  | -1.548904 |
| 44 | 1 | 0 | -7.774867 | 0.908409  | 0.217795  |

```

-----
SCF Done: E(RB3LYP) = -1109.52173143 A.U. after 1 cycles
          Convrg = 0.5341D-08 -V/T = 2.0062
Zero-point correction= 0.349743 (Hartree/Particle)
Thermal correction to Energy= 0.371089
Thermal correction to Enthalpy= 0.372033
Thermal correction to Gibbs Free Energy= 0.298084
Sum of electronic and zero-point Energies= -1109.171989
Sum of electronic and thermal Energies= -1109.150642
Sum of electronic and thermal Enthalpies= -1109.149698
Sum of electronic and thermal Free Energies= -1109.223648
    
```

### Structure 7

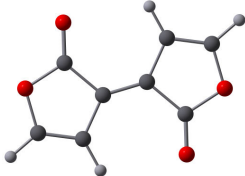

```

-----
Center      Atomic      Atomic      Coordinates (Angstroms)
Number      Number      Type         X             Y             Z
-----
1           6           0           -1.763306    -0.830813    0.000072
2           6           0           -0.659794    0.170253    0.000010
3           6           0           -1.301910    1.456259    -0.000151
4           6           0           -2.627616    1.230738    -0.000365
5           8           0           -2.957021    -0.113864    -0.000332
6           1           0           -0.820541    2.419021    -0.000177
7           6           0           0.659792    -0.170253    0.000140
8           6           0           1.763306    0.830813    0.000158
9           6           0           1.301908    -1.456259    0.000322
10          8           0           2.957022    0.113863    0.000136
11          6           0           2.627615    -1.230739    0.000298
12          1           0           0.820539    -2.419021    0.000403
13          8           0           -1.753628    -2.036288    -0.000034
14          8           0           1.753631    2.036289    -0.000132
15          1           0           3.468432    -1.906555    0.000354
16          1           0           -3.468434    1.906554    -0.000587
    
```

```

-----
SCF Done: E(RB3LYP) = -608.317918470 A.U. after 1 cycles
          Convrg = 0.4304D-08 -V/T = 2.005
Zero-point correction= 0.105641 (Hartree/Particle)
Thermal correction to Energy= 0.114613
Thermal correction to Enthalpy= 0.115557
Thermal correction to Gibbs Free Energy= 0.070690
Sum of electronic and zero-point Energies= -608.212277
Sum of electronic and thermal Energies= -608.203306
Sum of electronic and thermal Enthalpies= -608.202362
Sum of electronic and thermal Free Energies= -608.247229
    
```

### Structure 8



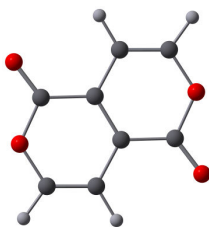

| Center Number | Atomic Number | Atomic Type | Coordinates (Angstroms) |           |           |
|---------------|---------------|-------------|-------------------------|-----------|-----------|
|               |               |             | X                       | Y         | Z         |
| 1             | 6             | 0           | 1.792936                | 0.638219  | -0.000145 |
| 2             | 6             | 0           | 0.328081                | 0.606623  | -0.000017 |
| 3             | 6             | 0           | -0.328080               | -0.606625 | 0.000044  |
| 4             | 6             | 0           | 0.405268                | -1.832715 | 0.000036  |
| 5             | 6             | 0           | 1.746350                | -1.771717 | 0.000031  |
| 6             | 1             | 0           | 0.101953                | 2.785655  | -0.000083 |
| 7             | 6             | 0           | -0.405267               | 1.832714  | -0.000022 |
| 8             | 6             | 0           | -1.792936               | -0.638220 | 0.000184  |
| 9             | 1             | 0           | -0.101950               | -2.785656 | 0.000095  |
| 10            | 6             | 0           | -1.746349               | 1.771717  | -0.000038 |
| 11            | 8             | 0           | -2.428674               | 0.591228  | 0.000017  |
| 12            | 8             | 0           | 2.428674                | -0.591227 | -0.000023 |
| 13            | 8             | 0           | 2.481780                | 1.636640  | 0.000040  |
| 14            | 8             | 0           | -2.481783               | -1.636639 | -0.000087 |
| 15            | 1             | 0           | 2.417387                | -2.618633 | 0.000073  |
| 16            | 1             | 0           | -2.417386               | 2.618634  | -0.000101 |

SCF Done: E(RB3LYP) = -608.340675802 A.U. after 1 cycles  
 Convrg = 0.1660D-08 -V/T = 2.0058  
 Zero-point correction= 0.107163 (Hartree/Particle)  
 Thermal correction to Energy= 0.115649  
 Thermal correction to Enthalpy= 0.116593  
 Thermal correction to Gibbs Free Energy= 0.073175  
 Sum of electronic and zero-point Energies= -608.233513  
 Sum of electronic and thermal Energies= -608.225027  
 Sum of electronic and thermal Enthalpies= -608.224082  
 Sum of electronic and thermal Free Energies= -608.267501

### Structure 9

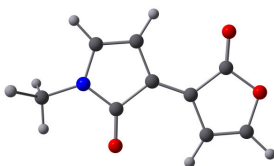

| Center Number | Atomic Number | Atomic Type | Coordinates (Angstroms) |           |           |
|---------------|---------------|-------------|-------------------------|-----------|-----------|
|               |               |             | X                       | Y         | Z         |
| 1             | 6             | 0           | -1.433261               | -0.683041 | -0.003767 |
| 2             | 6             | 0           | -0.251405               | 0.260617  | -0.001231 |
| 3             | 6             | 0           | -0.796723               | 1.587462  | 0.000642  |
| 4             | 6             | 0           | -2.149923               | 1.466662  | -0.003481 |
| 5             | 1             | 0           | -0.240875               | 2.508676  | 0.002027  |
| 6             | 6             | 0           | 1.044979                | -0.164984 | -0.000966 |
| 7             | 6             | 0           | 2.211164                | 0.754702  | 0.001460  |
| 8             | 6             | 0           | 1.598980                | -1.495080 | -0.001957 |
| 9             | 6             | 0           | 2.936187                | -1.363326 | -0.000051 |
| 10            | 1             | 0           | 1.046865                | -2.418684 | -0.003479 |
| 11            | 8             | 0           | -1.440589               | -1.908601 | 0.000930  |

|    |   |   |           |           |           |
|----|---|---|-----------|-----------|-----------|
| 12 | 8 | 0 | 2.290684  | 1.960122  | 0.002863  |
| 13 | 7 | 0 | -2.551357 | 0.134203  | -0.011905 |
| 14 | 6 | 0 | -3.926795 | -0.338685 | 0.010188  |
| 15 | 1 | 0 | -3.919454 | -1.415590 | -0.147844 |
| 16 | 1 | 0 | -4.398403 | -0.123756 | 0.971934  |
| 17 | 1 | 0 | -4.500985 | 0.134440  | -0.788039 |
| 18 | 1 | 0 | 3.730500  | -2.093180 | 0.000343  |
| 19 | 1 | 0 | -2.898306 | 2.245405  | -0.003779 |
| 20 | 8 | 0 | 3.355023  | -0.041857 | 0.002100  |

-----  
 SCF Done: E(RB3LYP) = -627.778697791 A.U. after 1 cycles  
 Convrg = 0.1893D-08 -V/T = 2.0059Zero-point  
 correction= 0.145692 (Hartree/Particle)  
 Thermal correction to Energy= 0.156724  
 Thermal correction to Enthalpy= 0.157669  
 Thermal correction to Gibbs Free Energy= 0.107864  
 Sum of electronic and zero-point Energies= -627.633006  
 Sum of electronic and thermal Energies= -627.621973  
 Sum of electronic and thermal Enthalpies= -627.621029  
 Sum of electronic and thermal Free Energies= -627.670834

### Structure 10

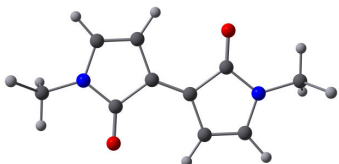

| Center Number | Atomic Number | Atomic Type | Coordinates (Angstroms) |           |           |
|---------------|---------------|-------------|-------------------------|-----------|-----------|
|               |               |             | X                       | Y         | Z         |
| 1             | 6             | 0           | -1.853426               | -0.667800 | -0.000024 |
| 2             | 6             | 0           | -0.641800               | 0.231263  | -0.000105 |
| 3             | 6             | 0           | -1.142641               | 1.580431  | -0.000085 |
| 4             | 6             | 0           | -2.496986               | 1.509828  | -0.000017 |
| 5             | 1             | 0           | -0.548533               | 2.477132  | -0.000168 |
| 6             | 6             | 0           | 0.641800                | -0.231260 | -0.000025 |
| 7             | 6             | 0           | 1.853427                | 0.667800  | -0.000143 |
| 8             | 6             | 0           | 1.142639                | -1.580429 | -0.000066 |
| 9             | 6             | 0           | 2.496984                | -1.509827 | -0.000019 |
| 10            | 1             | 0           | 0.548530                | -2.477128 | -0.000015 |
| 11            | 8             | 0           | -1.910228               | -1.894859 | -0.000013 |
| 12            | 8             | 0           | 1.910231                | 1.894860  | 0.000011  |
| 13            | 7             | 0           | -2.942728               | 0.188149  | 0.000208  |
| 14            | 7             | 0           | 2.942727                | -0.188150 | -0.000187 |
| 15            | 6             | 0           | -4.332913               | -0.235994 | 0.000069  |
| 16            | 1             | 0           | -4.354484               | -1.324343 | 0.000201  |
| 17            | 1             | 0           | -4.848632               | 0.130080  | 0.890574  |
| 18            | 1             | 0           | -4.848418               | 0.129771  | -0.890699 |
| 19            | 6             | 0           | 4.332913                | 0.235991  | 0.000232  |
| 20            | 1             | 0           | 4.848208                | -0.129677 | 0.891162  |
| 21            | 1             | 0           | 4.848831                | -0.130190 | -0.890113 |
| 22            | 1             | 0           | 4.354492                | 1.324339  | -0.000020 |
| 23            | 1             | 0           | 3.218883                | -2.312924 | 0.000082  |
| 24            | 1             | 0           | -3.218886               | 2.312924  | -0.000034 |

-----  
 SCF Done: E(RB3LYP) = -647.237557267 A.U. after 2 cycles  
 Convrg = 0.8530D-08 -V/T = 2.0061  
 Zero-point correction= 0.186058 (Hartree/Particle)  
 Thermal correction to Energy= 0.198937  
 Thermal correction to Enthalpy= 0.199881

Thermal correction to Gibbs Free Energy= 0.146344  
 Sum of electronic and zero-point Energies= -647.051499  
 Sum of electronic and thermal Energies= -647.038621  
 Sum of electronic and thermal Enthalpies= -647.037677  
 Sum of electronic and thermal Free Energies= -647.091214

### Structure 11

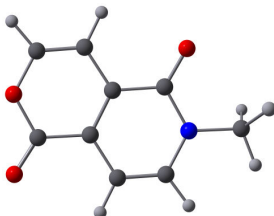

| Center Number | Atomic Number | Atomic Type | Coordinates (Angstroms) |           |           |
|---------------|---------------|-------------|-------------------------|-----------|-----------|
|               |               |             | X                       | Y         | Z         |
| 1             | 6             | 0           | -2.111555               | -0.740692 | 0.000125  |
| 2             | 6             | 0           | -0.651256               | -0.611601 | -0.000067 |
| 3             | 6             | 0           | -0.072837               | 0.648016  | -0.000084 |
| 4             | 6             | 0           | -0.898089               | 1.817017  | 0.000021  |
| 5             | 6             | 0           | -2.230586               | 1.666475  | 0.000048  |
| 6             | 1             | 0           | -0.296050               | -2.761200 | -0.000071 |
| 7             | 6             | 0           | 0.152794                | -1.779780 | -0.000121 |
| 8             | 6             | 0           | 1.381459                | 0.794510  | -0.000309 |
| 9             | 1             | 0           | -0.456706               | 2.802379  | -0.000016 |
| 10            | 6             | 0           | 1.503320                | -1.634861 | -0.000055 |
| 11            | 8             | 0           | -2.733930               | -1.783756 | -0.000200 |
| 12            | 8             | 0           | 1.967030                | 1.884347  | 0.000376  |
| 13            | 7             | 0           | 2.102053                | -0.400963 | -0.000096 |
| 14            | 6             | 0           | 3.565835                | -0.286823 | 0.000148  |
| 15            | 1             | 0           | 3.895549                | 0.257487  | 0.885091  |
| 16            | 1             | 0           | 3.994748                | -1.285507 | -0.000085 |
| 17            | 1             | 0           | 3.895773                | 0.257985  | -0.884397 |
| 18            | 1             | 0           | 2.177046                | -2.480065 | 0.000040  |
| 19            | 1             | 0           | -2.958800               | 2.464709  | 0.000054  |
| 20            | 8             | 0           | -2.833156               | 0.439081  | 0.000052  |

-----SCF Done:  
 E(RB3LYP) = -627.813535000 A.U. after 1 cycles  
 Conv g = 0.8550D-08 -V/T = 2.0059  
 Zero-point correction= 0.148328 (Hartree/Particle)  
 Thermal correction to Energy= 0.158434  
 Thermal correction to Enthalpy= 0.159378  
 Thermal correction to Gibbs Free Energy= 0.112553  
 Sum of electronic and zero-point Energies= -627.665207  
 Sum of electronic and thermal Energies= -627.655101  
 Sum of electronic and thermal Enthalpies= -627.654157  
 Sum of electronic and thermal Free Energies= -627.700982

### Structure 12

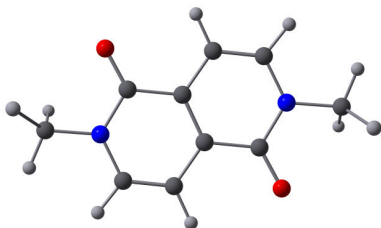

| Center | Atomic | Atomic | Coordinates (Angstroms) |  |  |
|--------|--------|--------|-------------------------|--|--|
|--------|--------|--------|-------------------------|--|--|

| Number | Number | Type | X         | Y         | Z         |
|--------|--------|------|-----------|-----------|-----------|
| 1      | 6      | 0    | 1.730482  | 0.816520  | -0.000113 |
| 2      | 6      | 0    | 0.276740  | 0.638459  | -0.000081 |
| 3      | 6      | 0    | -0.276740 | -0.638458 | -0.000166 |
| 4      | 6      | 0    | 0.564907  | -1.783798 | -0.000125 |
| 5      | 6      | 0    | 1.909441  | -1.608526 | 0.000026  |
| 6      | 1      | 0    | -0.138584 | 2.775431  | 0.000056  |
| 7      | 6      | 0    | -0.564908 | 1.783798  | -0.000007 |
| 8      | 6      | 0    | -1.730482 | -0.816520 | -0.000255 |
| 9      | 1      | 0    | 0.138582  | -2.775430 | -0.000162 |
| 10     | 6      | 0    | -1.909441 | 1.608525  | 0.000016  |
| 11     | 8      | 0    | 2.292176  | 1.920998  | 0.000021  |
| 12     | 8      | 0    | -2.292175 | -1.920997 | 0.000170  |
| 13     | 7      | 0    | -2.480178 | 0.357158  | -0.000125 |
| 14     | 7      | 0    | 2.480178  | -0.357158 | 0.000110  |
| 15     | 6      | 0    | -3.940117 | 0.210869  | 0.000164  |
| 16     | 1      | 0    | -4.260642 | -0.339050 | 0.885236  |
| 17     | 1      | 0    | -4.390890 | 1.200273  | -0.000716 |
| 18     | 1      | 0    | -4.260755 | -0.340690 | -0.883821 |
| 19     | 6      | 0    | 3.940117  | -0.210870 | 0.000112  |
| 20     | 1      | 0    | 4.260568  | 0.340832  | 0.884075  |
| 21     | 1      | 0    | 4.390891  | -1.200273 | 0.001246  |
| 22     | 1      | 0    | 4.260830  | 0.338908  | -0.884981 |
| 23     | 1      | 0    | -2.604828 | 2.435915  | 0.000117  |
| 24     | 1      | 0    | 2.604827  | -2.435917 | 0.000114  |

SCF Done: E(RB3LYP) = -647.283571651 A.U. after 1 cycles  
 Convrg = 0.5504D-08 -V/T = 2.0061  
 Zero-point correction= 0.189429 (Hartree/Particle)  
 Thermal correction to Energy= 0.201158  
 Thermal correction to Enthalpy= 0.202102  
 Thermal correction to Gibbs Free Energy= 0.151861  
 Sum of electronic and zero-point Energies= -647.094142  
 Sum of electronic and thermal Energies= -647.082413  
 Sum of electronic and thermal Enthalpies= -647.081469  
 Sum of electronic and thermal Free Energies= -647.131710

**Structure plots, cartesian coordinates, SCF convergence and thermochemistry data for structures 13-31 at SMD(toluene)/B3LYP/DGDZVP level of theory**

**Structure 13**

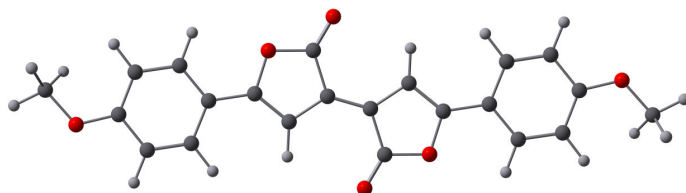

| Center Number | Atomic Number | Atomic Type | Coordinates (Angstroms) |           |           |
|---------------|---------------|-------------|-------------------------|-----------|-----------|
|               |               |             | X                       | Y         | Z         |
| 1             | 6             | 0           | 1.111038                | 1.602765  | -0.007777 |
| 2             | 6             | 0           | 0.664771                | 0.187561  | -0.005703 |
| 3             | 6             | 0           | 1.856360                | -0.597219 | -0.003633 |
| 4             | 6             | 0           | 2.923610                | 0.263104  | -0.004811 |
| 5             | 8             | 0           | 2.503226                | 1.591115  | -0.007752 |
| 6             | 1             | 0           | 1.905396                | -1.676517 | -0.001516 |
| 7             | 6             | 0           | -0.664786               | -0.187665 | -0.005332 |
| 8             | 6             | 0           | -1.111063               | -1.602867 | -0.002702 |
| 9             | 6             | 0           | -1.856371               | 0.597123  | -0.006535 |

|    |   |   |            |           |           |
|----|---|---|------------|-----------|-----------|
| 10 | 8 | 0 | -2.503253  | -1.591203 | -0.000769 |
| 11 | 6 | 0 | -2.923626  | -0.263189 | -0.003521 |
| 12 | 1 | 0 | -1.905399  | 1.676421  | -0.008555 |
| 13 | 8 | 0 | 0.491447   | 2.644872  | -0.010728 |
| 14 | 8 | 0 | -0.491482  | -2.644981 | -0.000028 |
| 15 | 6 | 0 | -4.353079  | -0.041638 | -0.002024 |
| 16 | 6 | 0 | -4.885201  | 1.270753  | -0.005828 |
| 17 | 6 | 0 | -5.252953  | -1.124917 | 0.003743  |
| 18 | 6 | 0 | -6.252719  | 1.482927  | -0.003974 |
| 19 | 1 | 0 | -4.219446  | 2.129151  | -0.010313 |
| 20 | 6 | 0 | -6.632756  | -0.920454 | 0.005834  |
| 21 | 1 | 0 | -4.868794  | -2.139756 | 0.006631  |
| 22 | 6 | 0 | -7.143286  | 0.388127  | 0.002019  |
| 23 | 1 | 0 | -6.661615  | 2.489371  | -0.006926 |
| 24 | 1 | 0 | -7.293958  | -1.779529 | 0.010247  |
| 25 | 6 | 0 | 4.353067   | 0.041578  | -0.003200 |
| 26 | 6 | 0 | 5.252926   | 1.124883  | -0.004979 |
| 27 | 6 | 0 | 4.885208   | -1.270805 | 0.000521  |
| 28 | 6 | 0 | 6.632734   | 0.920455  | -0.002568 |
| 29 | 1 | 0 | 4.868752   | 2.139716  | -0.008091 |
| 30 | 6 | 0 | 6.252729   | -1.482946 | 0.003091  |
| 31 | 1 | 0 | 4.219464   | -2.129224 | 0.001654  |
| 32 | 6 | 0 | 7.143282   | -0.388118 | 0.001953  |
| 33 | 1 | 0 | 7.293925   | 1.779547  | -0.004051 |
| 34 | 1 | 0 | 6.661638   | -2.489384 | 0.006235  |
| 35 | 8 | 0 | -8.465453  | 0.703410  | 0.003496  |
| 36 | 8 | 0 | 8.465453   | -0.703367 | 0.005924  |
| 37 | 6 | 0 | 9.423562   | 0.362696  | 0.004804  |
| 38 | 1 | 0 | 9.321922   | 0.988903  | 0.898447  |
| 39 | 1 | 0 | 10.401436  | -0.121147 | 0.013470  |
| 40 | 1 | 0 | 9.331984   | 0.977642  | -0.897753 |
| 41 | 6 | 0 | -9.423573  | -0.362609 | 0.012026  |
| 42 | 1 | 0 | -9.324198  | -0.978399 | 0.913147  |
| 43 | 1 | 0 | -10.401453 | 0.121295  | 0.012398  |
| 44 | 1 | 0 | -9.329750  | -0.987980 | -0.883088 |

-----  
 SCF Done: E(RB3LYP) = -1299.4800577 A.U. after 1 cycles  
 Convq = 0.4448D-08 -V/T = 2.0143  
 Zero-point correction= 0.332571 (Hartree/Particle)  
 Thermal correction to Energy= 0.355633  
 Thermal correction to Enthalpy= 0.356577  
 Thermal correction to Gibbs Free Energy= 0.278404  
 Sum of electronic and zero-point Energies= -1299.147435  
 Sum of electronic and thermal Energies= -1299.124373  
 Sum of electronic and thermal Enthalpies= -1299.123429  
 Sum of electronic and thermal Free Energies= -1299.201602

### Structure 14

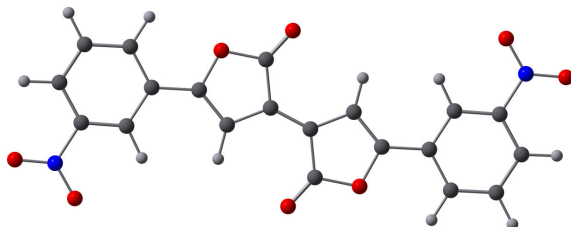

-----

| Center Number | Atomic Number | Atomic Type | Coordinates (Angstroms) |           |           |
|---------------|---------------|-------------|-------------------------|-----------|-----------|
|               |               |             | X                       | Y         | Z         |
| 1             | 6             | 0           | 0.760957                | -1.799641 | -0.001996 |
| 2             | 6             | 0           | 0.610311                | -0.319161 | -0.001419 |

-----

|    |   |   |           |           |           |
|----|---|---|-----------|-----------|-----------|
| 3  | 6 | 0 | 1.937674  | 0.209391  | -0.001634 |
| 4  | 6 | 0 | 2.801074  | -0.850665 | -0.000591 |
| 5  | 8 | 0 | 2.129922  | -2.065908 | 0.000115  |
| 6  | 1 | 0 | 2.204931  | 1.256243  | -0.001933 |
| 7  | 6 | 0 | -0.610311 | 0.319162  | -0.001358 |
| 8  | 6 | 0 | -0.760958 | 1.799642  | -0.001775 |
| 9  | 6 | 0 | -1.937674 | -0.209390 | -0.001524 |
| 10 | 8 | 0 | -2.129922 | 2.065910  | 0.000176  |
| 11 | 6 | 0 | -2.801074 | 0.850666  | -0.000504 |
| 12 | 1 | 0 | -2.204931 | -1.256242 | -0.001849 |
| 13 | 8 | 0 | -0.054298 | -2.691954 | 0.000349  |
| 14 | 8 | 0 | 0.054297  | 2.691956  | 0.000335  |
| 15 | 6 | 0 | -4.253997 | 0.917895  | 0.000234  |
| 16 | 6 | 0 | -5.014406 | -0.266646 | -0.000312 |
| 17 | 6 | 0 | -4.918615 | 2.162190  | 0.001460  |
| 18 | 6 | 0 | -6.401597 | -0.175427 | 0.000395  |
| 19 | 1 | 0 | -4.542371 | -1.242066 | -0.001257 |
| 20 | 6 | 0 | -6.313072 | 2.221765  | 0.002132  |
| 21 | 1 | 0 | -4.338352 | 3.079059  | 0.001862  |
| 22 | 6 | 0 | -7.073928 | 1.052180  | 0.001623  |
| 23 | 1 | 0 | -6.811513 | 3.186739  | 0.003074  |
| 24 | 1 | 0 | -8.157508 | 1.080812  | 0.002152  |
| 25 | 6 | 0 | 4.253997  | -0.917894 | 0.000188  |
| 26 | 6 | 0 | 4.918614  | -2.162190 | 0.001467  |
| 27 | 6 | 0 | 5.014406  | 0.266646  | -0.000373 |
| 28 | 6 | 0 | 6.313071  | -2.221765 | 0.002178  |
| 29 | 1 | 0 | 4.338351  | -3.079058 | 0.001881  |
| 30 | 6 | 0 | 6.401597  | 0.175426  | 0.000372  |
| 31 | 1 | 0 | 4.542373  | 1.242067  | -0.001358 |
| 32 | 6 | 0 | 7.073928  | -1.052181 | 0.001655  |
| 33 | 1 | 0 | 6.811512  | -3.186739 | 0.003162  |
| 34 | 1 | 0 | 8.157508  | -1.080813 | 0.002213  |
| 35 | 7 | 0 | 7.191440  | 1.421264  | -0.000183 |
| 36 | 8 | 0 | 8.423581  | 1.321882  | 0.000469  |
| 37 | 8 | 0 | 6.580700  | 2.496240  | -0.001373 |
| 38 | 7 | 0 | -7.191439 | -1.421266 | -0.000141 |
| 39 | 8 | 0 | -8.423580 | -1.321885 | 0.000413  |
| 40 | 8 | 0 | -6.580700 | -2.496241 | -0.001356 |

-----  
 SCF Done: E(RB3LYP) = -1479.46667094 A.U. after 1 cycles  
           Conv = 0.9287D-08 -V/T = 2.0139  
 Zero-point correction= 0.272306 (Hartree/Particle)  
 Thermal correction to Energy= 0.294370  
 Thermal correction to Enthalpy= 0.295315  
 Thermal correction to Gibbs Free Energy= 0.216495  
 Sum of electronic and zero-point Energies= -1479.194365  
 Sum of electronic and thermal Energies= -1479.172301  
 Sum of electronic and thermal Enthalpies= -1479.171356  
 Sum of electronic and thermal Free Energies= -1479.250176

### Structure 15

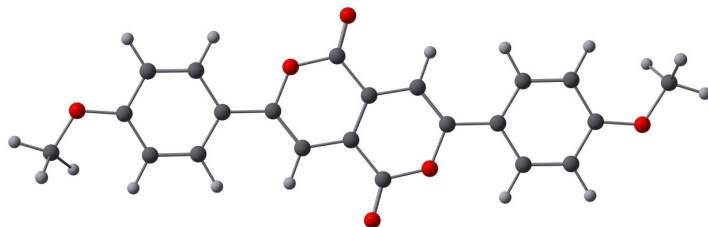

-----  

| Center Number | Atomic Number | Atomic Type | Coordinates (Angstroms) |   |   |
|---------------|---------------|-------------|-------------------------|---|---|
|               |               |             | X                       | Y | Z |

|    |   |   |           |           |           |
|----|---|---|-----------|-----------|-----------|
| 1  | 6 | 0 | -0.651682 | 1.784302  | 0.032618  |
| 2  | 6 | 0 | 0.266428  | 0.640691  | 0.012108  |
| 3  | 6 | 0 | -0.266419 | -0.640764 | -0.009530 |
| 4  | 6 | 0 | -1.671814 | -0.863043 | -0.014410 |
| 5  | 6 | 0 | -2.519395 | 0.207450  | 0.008855  |
| 6  | 1 | 0 | 2.046567  | 1.877325  | 0.043385  |
| 7  | 6 | 0 | 1.671822  | 0.862976  | 0.016578  |
| 8  | 6 | 0 | 0.651693  | -1.784378 | -0.029670 |
| 9  | 1 | 0 | -2.046552 | -1.877394 | -0.041291 |
| 10 | 6 | 0 | 2.519400  | -0.207504 | -0.007217 |
| 11 | 8 | 0 | 2.002259  | -1.480969 | -0.031001 |
| 12 | 8 | 0 | -2.002256 | 1.480910  | 0.032861  |
| 13 | 8 | 0 | -0.331846 | 2.958236  | 0.049947  |
| 14 | 8 | 0 | 0.331847  | -2.958281 | -0.048734 |
| 15 | 6 | 0 | -3.985135 | 0.187306  | 0.008348  |
| 16 | 6 | 0 | -4.724831 | 1.390719  | -0.038296 |
| 17 | 6 | 0 | -4.702561 | -1.023205 | 0.052955  |
| 18 | 6 | 0 | -6.112439 | 1.379158  | -0.045769 |
| 19 | 1 | 0 | -4.204753 | 2.341876  | -0.072659 |
| 20 | 6 | 0 | -6.096536 | -1.046235 | 0.046496  |
| 21 | 1 | 0 | -4.178779 | -1.973158 | 0.101160  |
| 22 | 6 | 0 | -6.815243 | 0.161146  | -0.005111 |
| 23 | 1 | 0 | -6.675301 | 2.307710  | -0.085189 |
| 24 | 1 | 0 | -6.606732 | -2.002391 | 0.086546  |
| 25 | 6 | 0 | 3.985140  | -0.187334 | -0.007504 |
| 26 | 6 | 0 | 4.724887  | -1.390731 | 0.038735  |
| 27 | 6 | 0 | 4.702515  | 1.023192  | -0.052559 |
| 28 | 6 | 0 | 6.112499  | -1.379141 | 0.045410  |
| 29 | 1 | 0 | 4.204849  | -2.341898 | 0.073411  |
| 30 | 6 | 0 | 6.096494  | 1.046249  | -0.046931 |
| 31 | 1 | 0 | 4.178687  | 1.973134  | -0.100506 |
| 32 | 6 | 0 | 6.815254  | -0.161115 | 0.004290  |
| 33 | 1 | 0 | 6.675404  | -2.307680 | 0.084515  |
| 34 | 1 | 0 | 6.606649  | 2.002412  | -0.087335 |
| 35 | 8 | 0 | -8.172532 | 0.255705  | -0.017850 |
| 36 | 8 | 0 | 8.172553  | -0.255644 | 0.016174  |
| 37 | 6 | 0 | 8.945445  | 0.949497  | -0.005956 |
| 38 | 1 | 0 | 8.737774  | 1.573165  | 0.871501  |
| 39 | 1 | 0 | 9.989232  | 0.631799  | 0.017924  |
| 40 | 1 | 0 | 8.764951  | 1.523611  | -0.922277 |
| 41 | 6 | 0 | -8.945469 | -0.949418 | 0.003664  |
| 42 | 1 | 0 | -9.989233 | -0.631692 | -0.020855 |
| 43 | 1 | 0 | -8.737249 | -1.572993 | -0.873728 |
| 44 | 1 | 0 | -8.765580 | -1.523638 | 0.920037  |

SCF Done: E(RB3LYP) = -1299.48949249 A.U. after 1 cycles  
 Conv g = 0.5891D-08 -V/T = 2.0143  
 Zero-point correction= 0.334402 (Hartree/Particle)  
 Thermal correction to Energy= 0.357623  
 Thermal correction to Enthalpy= 0.358567  
 Thermal correction to Gibbs Free Energy= 0.280633  
 Sum of electronic and zero-point Energies= -1299.155091  
 Sum of electronic and thermal Energies= -1299.131870  
 Sum of electronic and thermal Enthalpies= -1299.130925  
 Sum of electronic and thermal Free Energies= -1299.208859

### Structure 16

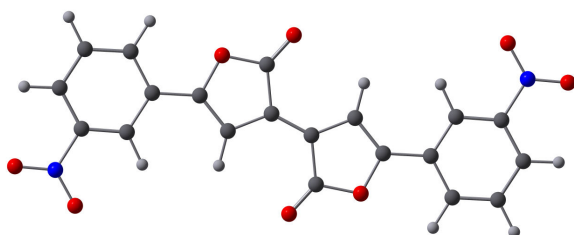

| Center Number | Atomic Number | Atomic Type | Coordinates (Angstroms) |           |           |
|---------------|---------------|-------------|-------------------------|-----------|-----------|
|               |               |             | X                       | Y         | Z         |
| 1             | 6             | 0           | 0.760957                | -1.799641 | -0.001996 |
| 2             | 6             | 0           | 0.610311                | -0.319161 | -0.001419 |
| 3             | 6             | 0           | 1.937674                | 0.209391  | -0.001634 |
| 4             | 6             | 0           | 2.801074                | -0.850665 | -0.000591 |
| 5             | 8             | 0           | 2.129922                | -2.065908 | 0.000115  |
| 6             | 1             | 0           | 2.204931                | 1.256243  | -0.001933 |
| 7             | 6             | 0           | -0.610311               | 0.319162  | -0.001358 |
| 8             | 6             | 0           | -0.760958               | 1.799642  | -0.001775 |
| 9             | 6             | 0           | -1.937674               | -0.209390 | -0.001524 |
| 10            | 8             | 0           | -2.129922               | 2.065910  | 0.000176  |
| 11            | 6             | 0           | -2.801074               | 0.850666  | -0.000504 |
| 12            | 1             | 0           | -2.204931               | -1.256242 | -0.001849 |
| 13            | 8             | 0           | -0.054298               | -2.691954 | 0.000349  |
| 14            | 8             | 0           | 0.054297                | 2.691956  | 0.000335  |
| 15            | 6             | 0           | -4.253997               | 0.917895  | 0.000234  |
| 16            | 6             | 0           | -5.014406               | -0.266646 | -0.000312 |
| 17            | 6             | 0           | -4.918615               | 2.162190  | 0.001460  |
| 18            | 6             | 0           | -6.401597               | -0.175427 | 0.000395  |
| 19            | 1             | 0           | -4.542371               | -1.242066 | -0.001257 |
| 20            | 6             | 0           | -6.313072               | 2.221765  | 0.002132  |
| 21            | 1             | 0           | -4.338352               | 3.079059  | 0.001862  |
| 22            | 6             | 0           | -7.073928               | 1.052180  | 0.001623  |
| 23            | 1             | 0           | -6.811513               | 3.186739  | 0.003074  |
| 24            | 1             | 0           | -8.157508               | 1.080812  | 0.002152  |
| 25            | 6             | 0           | 4.253997                | -0.917894 | 0.000188  |
| 26            | 6             | 0           | 4.918614                | -2.162190 | 0.001467  |
| 27            | 6             | 0           | 5.014406                | 0.266646  | -0.000373 |
| 28            | 6             | 0           | 6.313071                | -2.221765 | 0.002178  |
| 29            | 1             | 0           | 4.338351                | -3.079058 | 0.001881  |
| 30            | 6             | 0           | 6.401597                | 0.175426  | 0.000372  |
| 31            | 1             | 0           | 4.542373                | 1.242067  | -0.001358 |
| 32            | 6             | 0           | 7.073928                | -1.052181 | 0.001655  |
| 33            | 1             | 0           | 6.811512                | -3.186739 | 0.003162  |
| 34            | 1             | 0           | 8.157508                | -1.080813 | 0.002213  |
| 35            | 7             | 0           | 7.191440                | 1.421264  | -0.000183 |
| 36            | 8             | 0           | 8.423581                | 1.321882  | 0.000469  |
| 37            | 8             | 0           | 6.580700                | 2.496240  | -0.001373 |
| 38            | 7             | 0           | -7.191439               | -1.421266 | -0.000141 |
| 39            | 8             | 0           | -8.423580               | -1.321885 | 0.000413  |
| 40            | 8             | 0           | -6.580700               | -2.496241 | -0.001356 |

SCF Done: E(RB3LYP) = -1479.46667094 A.U. after 1 cycles  
 Convg = 0.9287D-08 -V/T = 2.0139  
 Zero-point correction= 0.272306 (Hartree/Particle)  
 Thermal correction to Energy= 0.294370  
 Thermal correction to Enthalpy= 0.295315  
 Thermal correction to Gibbs Free Energy= 0.216495  
 Sum of electronic and zero-point Energies= -1479.194365  
 Sum of electronic and thermal Energies= -1479.172301  
 Sum of electronic and thermal Enthalpies= -1479.171356



Sum of electronic and thermal Free Energies= -1479.250176

**Structure 17**

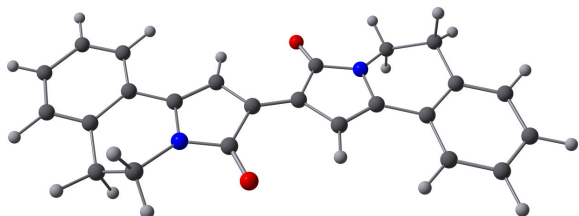

| Center Number | Atomic Number | Atomic Type | Coordinates (Angstroms) |           |           |
|---------------|---------------|-------------|-------------------------|-----------|-----------|
|               |               |             | X                       | Y         | Z         |
| 1             | 6             | 0           | 1.259132                | -1.513120 | 0.132460  |
| 2             | 6             | 0           | 0.677616                | -0.128056 | 0.023488  |
| 3             | 6             | 0           | 1.788000                | 0.775557  | -0.019604 |
| 4             | 6             | 0           | 2.945496                | 0.030357  | 0.036355  |
| 5             | 1             | 0           | 1.723909                | 1.849452  | -0.114926 |
| 6             | 6             | 0           | -0.677632               | 0.127949  | -0.025441 |
| 7             | 6             | 0           | -1.259160               | 1.512990  | -0.134620 |
| 8             | 6             | 0           | -1.788013               | -0.775670 | 0.017544  |
| 9             | 6             | 0           | -2.945516               | -0.030406 | -0.037436 |
| 10            | 1             | 0           | -1.723911               | -1.849580 | 0.112689  |
| 11            | 8             | 0           | 0.684320                | -2.599743 | 0.240953  |
| 12            | 8             | 0           | -0.684348               | 2.599704  | -0.242196 |
| 13            | 7             | 0           | 2.632212                | -1.337213 | 0.100067  |
| 14            | 7             | 0           | -2.632216               | 1.337176  | -0.100828 |
| 15            | 6             | 0           | 3.634424                | -2.369033 | 0.344046  |
| 16            | 1             | 0           | 3.828774                | -2.446993 | 1.421545  |
| 17            | 1             | 0           | 3.229971                | -3.324090 | 0.002684  |
| 18            | 6             | 0           | -3.634604               | 2.369160  | -0.343386 |
| 19            | 1             | 0           | -3.829941               | 2.447603  | -1.420670 |
| 20            | 1             | 0           | -3.229793               | 3.324047  | -0.001976 |
| 21            | 6             | 0           | 4.347240                | 0.424132  | 0.023061  |
| 22            | 6             | 0           | 5.337201                | -0.573117 | -0.162087 |
| 23            | 6             | 0           | 4.732504                | 1.769990  | 0.194932  |
| 24            | 6             | 0           | 6.685544                | -0.197007 | -0.163774 |
| 25            | 6             | 0           | 6.078546                | 2.126499  | 0.182417  |
| 26            | 1             | 0           | 3.972548                | 2.531305  | 0.348930  |
| 27            | 6             | 0           | 7.060342                | 1.139794  | 0.005245  |
| 28            | 1             | 0           | 7.450289                | -0.958757 | -0.301480 |
| 29            | 1             | 0           | 6.366076                | 3.166082  | 0.318059  |
| 30            | 1             | 0           | 8.113041                | 1.412153  | 0.003002  |
| 31            | 6             | 0           | -4.347270               | -0.424112 | -0.023167 |
| 32            | 6             | 0           | -5.337013               | 0.573095  | 0.163399  |
| 33            | 6             | 0           | -4.732756               | -1.769870 | -0.195314 |
| 34            | 6             | 0           | -6.685369               | 0.197049  | 0.166154  |
| 35            | 6             | 0           | -6.078805               | -2.126318 | -0.181740 |
| 36            | 1             | 0           | -3.972981               | -2.531154 | -0.350353 |
| 37            | 6             | 0           | -7.060387               | -1.139654 | -0.003169 |
| 38            | 1             | 0           | -7.449949               | 0.958765  | 0.304955  |
| 39            | 1             | 0           | -6.366509               | -3.165823 | -0.317607 |
| 40            | 1             | 0           | -8.113098               | -1.411962 | -0.000078 |
| 41            | 6             | 0           | 4.917695                | -2.008285 | -0.408301 |
| 42            | 1             | 0           | 4.750510                | -2.152225 | -1.484019 |
| 43            | 1             | 0           | 5.716814                | -2.694950 | -0.113947 |
| 44            | 6             | 0           | -4.917203               | 2.008114  | 0.409964  |
| 45            | 1             | 0           | -5.716556               | 2.694969  | 0.116693  |
| 46            | 1             | 0           | -4.749013               | 2.151502  | 1.485599  |

SCF Done: E(RB3LYP) = -1185.53104509 A.U. after 1 cycles  
 Convrg = 0.6432D-08 -V/T = 2.0152  
 Zero-point correction= 0.365155 (Hartree/Particle)  
 Thermal correction to Energy= 0.386183  
 Thermal correction to Enthalpy= 0.387127  
 Thermal correction to Gibbs Free Energy= 0.315024  
 Sum of electronic and zero-point Energies= -1185.165890  
 Sum of electronic and thermal Energies= -1185.144862  
 Sum of electronic and thermal Enthalpies= -1185.143918  
 Sum of electronic and thermal Free Energies= -1185.216022

**Structure 18**

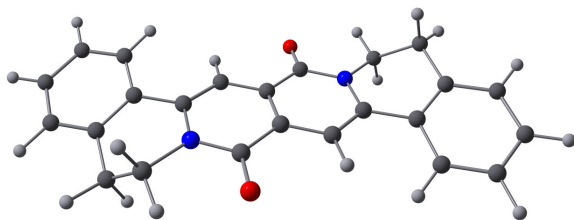

| Center Number | Atomic Number | Atomic Type | Coordinates (Angstroms) |           |           |
|---------------|---------------|-------------|-------------------------|-----------|-----------|
|               |               |             | X                       | Y         | Z         |
| 1             | 6             | 0           | 0.829288                | -1.705939 | 0.243835  |
| 2             | 6             | 0           | -0.191780               | -0.665298 | 0.073870  |
| 3             | 6             | 0           | 0.191779                | 0.665297  | -0.073882 |
| 4             | 6             | 0           | 1.562758                | 1.026837  | -0.073294 |
| 5             | 6             | 0           | 2.533257                | 0.065395  | 0.073640  |
| 6             | 1             | 0           | -1.830263               | -2.064981 | 0.217786  |
| 7             | 6             | 0           | -1.562758               | -1.026839 | 0.073285  |
| 8             | 6             | 0           | -0.829288               | 1.705936  | -0.243850 |
| 9             | 1             | 0           | 1.830264                | 2.064980  | -0.217795 |
| 10            | 6             | 0           | -2.533257               | -0.065396 | -0.073646 |
| 11            | 8             | 0           | 0.550988                | -2.904535 | 0.417659  |
| 12            | 8             | 0           | -0.550989               | 2.904535  | -0.417659 |
| 13            | 7             | 0           | -2.158809               | 1.272641  | -0.200592 |
| 14            | 7             | 0           | 2.158809                | -1.272642 | 0.200584  |
| 15            | 6             | 0           | -3.204891               | 2.306159  | -0.361139 |
| 16            | 1             | 0           | -2.748764               | 3.263909  | -0.117926 |
| 17            | 1             | 0           | -3.512166               | 2.334038  | -1.413597 |
| 18            | 6             | 0           | 3.204891                | -2.306159 | 0.361139  |
| 19            | 1             | 0           | 3.512161                | -2.334036 | 1.413599  |
| 20            | 1             | 0           | 2.748767                | -3.263910 | 0.117925  |
| 21            | 6             | 0           | -3.978872               | -0.383014 | -0.074544 |
| 22            | 6             | 0           | -4.916171               | 0.618427  | 0.257235  |
| 23            | 6             | 0           | -4.439438               | -1.680659 | -0.374888 |
| 24            | 6             | 0           | -6.279219               | 0.304923  | 0.305301  |
| 25            | 6             | 0           | -5.799941               | -1.982532 | -0.322548 |
| 26            | 1             | 0           | -3.737169               | -2.455028 | -0.668852 |
| 27            | 6             | 0           | -6.726050               | -0.989732 | 0.024820  |
| 28            | 1             | 0           | -6.994999               | 1.083660  | 0.560809  |
| 29            | 1             | 0           | -6.138069               | -2.987701 | -0.562067 |
| 30            | 1             | 0           | -7.788018               | -1.220570 | 0.062319  |
| 31            | 6             | 0           | 3.978872                | 0.383014  | 0.074545  |
| 32            | 6             | 0           | 4.916173                | -0.618426 | -0.257230 |
| 33            | 6             | 0           | 4.439436                | 1.680659  | 0.374890  |
| 34            | 6             | 0           | 6.279221                | -0.304922 | -0.305289 |
| 35            | 6             | 0           | 5.799939                | 1.982533  | 0.322555  |
| 36            | 1             | 0           | 3.737164                | 2.455028  | 0.668850  |
| 37            | 6             | 0           | 6.726049                | 0.989734  | -0.024807 |
| 38            | 1             | 0           | 6.995002                | -1.083659 | -0.560793 |

|    |   |   |           |           |           |
|----|---|---|-----------|-----------|-----------|
| 39 | 1 | 0 | 6.138065  | 2.987703  | 0.562075  |
| 40 | 1 | 0 | 7.788018  | 1.220572  | -0.062302 |
| 41 | 6 | 0 | 4.395207  | -2.005290 | -0.540600 |
| 42 | 1 | 0 | 4.087097  | -2.091165 | -1.591354 |
| 43 | 1 | 0 | 5.173097  | -2.755405 | -0.369717 |
| 44 | 6 | 0 | -4.395203 | 2.005290  | 0.540605  |
| 45 | 1 | 0 | -4.087088 | 2.091164  | 1.591358  |
| 46 | 1 | 0 | -5.173093 | 2.755406  | 0.369726  |

-----  
 SCF Done: E(RB3LYP) = -1185.56219704 A.U. after 1 cycles  
 Conv g = 0.6245D-08 -V/T = 2.0152  
 Zero-point correction= 0.367223 (Hartree/Particle)  
 Thermal correction to Energy= 0.387566  
 Thermal correction to Enthalpy= 0.388510  
 Thermal correction to Gibbs Free Energy= 0.317806  
 Sum of electronic and zero-point Energies= -1185.194974  
 Sum of electronic and thermal Energies= -1185.174631  
 Sum of electronic and thermal Enthalpies= -1185.173687  
 Sum of electronic and thermal Free Energies= -1185.244391

### Structure 19

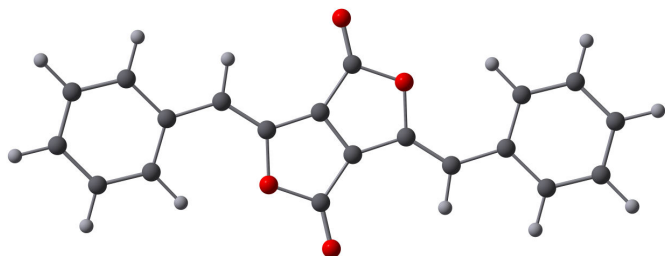

| Center Number | Atomic Number | Atomic Type | Coordinates (Angstroms) |           |           |
|---------------|---------------|-------------|-------------------------|-----------|-----------|
|               |               |             | X                       | Y         | Z         |
| 1             | 6             | 0           | 0.399287                | 1.757684  | -0.057650 |
| 2             | 6             | 0           | -0.417643               | 0.538336  | -0.060355 |
| 3             | 6             | 0           | 0.417643                | -0.537386 | -0.060382 |
| 4             | 6             | 0           | 1.781570                | -0.087801 | -0.050590 |
| 5             | 6             | 0           | -1.781670               | 0.088933  | -0.050481 |
| 6             | 6             | 0           | -0.399610               | -1.756708 | -0.057643 |
| 7             | 8             | 0           | -1.730144               | -1.308718 | -0.053823 |
| 8             | 8             | 0           | 1.730124                | 1.309602  | -0.053662 |
| 9             | 8             | 0           | 0.124633                | 2.934995  | -0.058312 |
| 10            | 8             | 0           | -0.124792               | -2.934032 | -0.058874 |
| 11            | 6             | 0           | -2.932565               | 0.806315  | -0.025218 |
| 12            | 1             | 0           | -2.773778               | 1.882340  | -0.018508 |
| 13            | 6             | 0           | -4.319637               | 0.366914  | 0.006549  |
| 14            | 6             | 0           | -5.318221               | 1.365223  | 0.092312  |
| 15            | 6             | 0           | -4.727831               | -0.987855 | -0.037239 |
| 16            | 6             | 0           | -6.670427               | 1.028862  | 0.135940  |
| 17            | 1             | 0           | -5.022467               | 2.411591  | 0.125779  |
| 18            | 6             | 0           | -6.081715               | -1.317462 | 0.003625  |
| 19            | 1             | 0           | -3.988149               | -1.776852 | -0.103448 |
| 20            | 6             | 0           | -7.058232               | -0.315805 | 0.092486  |
| 21            | 1             | 0           | -7.421294               | 1.812177  | 0.203057  |
| 22            | 1             | 0           | -6.379044               | -2.362690 | -0.032165 |
| 23            | 1             | 0           | -8.111908               | -0.582027 | 0.125440  |
| 24            | 6             | 0           | 2.932215                | -0.805731 | -0.025390 |
| 25            | 1             | 0           | 2.772827                | -1.881653 | -0.018722 |
| 26            | 6             | 0           | 4.319562                | -0.366996 | 0.006434  |
| 27            | 6             | 0           | 4.728565                | 0.987493  | -0.037575 |
| 28            | 6             | 0           | 5.317583                | -1.365847 | 0.092521  |

|    |   |   |          |           |           |
|----|---|---|----------|-----------|-----------|
| 29 | 6 | 0 | 6.082688 | 1.316320  | 0.003406  |
| 30 | 1 | 0 | 3.989590 | 1.777114  | -0.104145 |
| 31 | 6 | 0 | 6.669988 | -1.030277 | 0.136236  |
| 32 | 1 | 0 | 5.021317 | -2.412055 | 0.126245  |
| 33 | 6 | 0 | 7.058615 | 0.314148  | 0.092557  |
| 34 | 1 | 0 | 6.380580 | 2.361378  | -0.032579 |
| 35 | 1 | 0 | 7.420337 | -1.814065 | 0.203610  |
| 36 | 1 | 0 | 8.112430 | 0.579811  | 0.125543  |

---

SCF Done: E(RB3LYP) = -1070.37475784 A.U. after 1 cycles  
 Conv g = 0.6476D-08 -V/T = 2.0147  
 Zero-point correction= 0.268065 (Hartree/Particle)  
 Thermal correction to Energy= 0.286517  
 Thermal correction to Enthalpy= 0.287461  
 Thermal correction to Gibbs Free Energy= 0.219589  
 Sum of electronic and zero-point Energies= -1070.106693  
 Sum of electronic and thermal Energies= -1070.088241  
 Sum of electronic and thermal Enthalpies= -1070.087297  
 Sum of electronic and thermal Free Energies= -1070.155169

### Structure 20

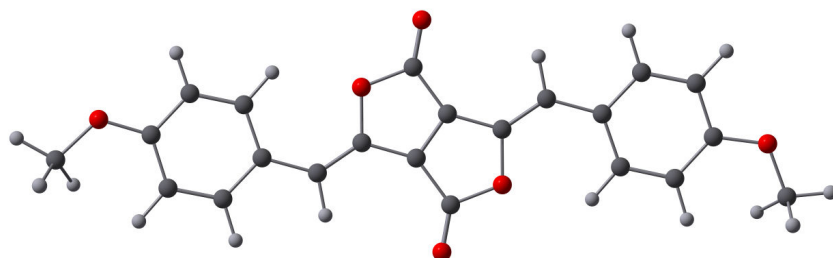


---

| Center Number | Atomic Number | Atomic Type | Coordinates (Angstroms) |           |           |
|---------------|---------------|-------------|-------------------------|-----------|-----------|
|               |               |             | X                       | Y         | Z         |
| 1             | 6             | 0           | 0.494976                | -1.640859 | -0.072003 |
| 2             | 6             | 0           | -0.374182               | -0.461767 | -0.075744 |
| 3             | 6             | 0           | 0.414328                | 0.653142  | -0.063810 |
| 4             | 6             | 0           | 1.794151                | 0.265914  | -0.047693 |
| 5             | 6             | 0           | -1.754340               | -0.073893 | -0.076259 |
| 6             | 6             | 0           | -0.454644               | 1.832647  | -0.062398 |
| 7             | 8             | 0           | -1.764251               | 1.326202  | -0.072507 |
| 8             | 8             | 0           | 1.804810                | -1.134242 | -0.056902 |
| 9             | 8             | 0           | 0.275006                | -2.831530 | -0.079268 |
| 10            | 8             | 0           | -0.233785               | 3.022930  | -0.054793 |
| 11            | 6             | 0           | -2.878655               | -0.837005 | -0.064734 |
| 12            | 1             | 0           | -2.676659               | -1.906061 | -0.060657 |
| 13            | 6             | 0           | -4.276784               | -0.454454 | -0.043542 |
| 14            | 6             | 0           | -5.243326               | -1.480940 | 0.033075  |
| 15            | 6             | 0           | -4.746841               | 0.884697  | -0.086289 |
| 16            | 6             | 0           | -6.610114               | -1.210089 | 0.073086  |
| 17            | 1             | 0           | -4.914661               | -2.517525 | 0.065056  |
| 18            | 6             | 0           | -6.103050               | 1.164888  | -0.051581 |
| 19            | 1             | 0           | -4.042452               | 1.705844  | -0.146381 |
| 20            | 6             | 0           | -7.050435               | 0.123632  | 0.032705  |
| 21            | 1             | 0           | -7.314378               | -2.032573 | 0.133364  |
| 22            | 1             | 0           | -6.459684               | 2.190879  | -0.084006 |
| 23            | 6             | 0           | 2.917661                | 1.029690  | -0.016583 |
| 24            | 1             | 0           | 2.714202                | 2.098465  | -0.006192 |
| 25            | 6             | 0           | 4.316377                | 0.649958  | 0.011759  |
| 26            | 6             | 0           | 4.788463                | -0.681679 | -0.030478 |
| 27            | 6             | 0           | 5.284197                | 1.683726  | 0.090049  |
| 28            | 6             | 0           | 6.151425                | -0.970066 | -0.000719 |

|    |   |   |            |           |           |
|----|---|---|------------|-----------|-----------|
| 29 | 1 | 0 | 4.084998   | -1.503909 | -0.088995 |
| 30 | 6 | 0 | 6.641737   | 1.408223  | 0.123193  |
| 31 | 1 | 0 | 4.954068   | 2.719644  | 0.124736  |
| 32 | 6 | 0 | 7.091366   | 0.074041  | 0.076470  |
| 33 | 1 | 0 | 6.470037   | -2.006215 | -0.036738 |
| 34 | 1 | 0 | 7.375304   | 2.207546  | 0.182420  |
| 35 | 8 | 0 | -8.353501  | 0.509412  | 0.067958  |
| 36 | 8 | 0 | 8.439318   | -0.099893 | 0.108925  |
| 37 | 6 | 0 | -9.362933  | -0.497907 | 0.200132  |
| 38 | 1 | 0 | -10.312142 | 0.039254  | 0.238124  |
| 39 | 1 | 0 | -9.367504  | -1.176111 | -0.661105 |
| 40 | 1 | 0 | -9.235009  | -1.070197 | 1.126143  |
| 41 | 6 | 0 | 8.963717   | -1.430792 | 0.030322  |
| 42 | 1 | 0 | 10.049232  | -1.320750 | 0.048664  |
| 43 | 1 | 0 | 8.648881   | -2.036429 | 0.888018  |
| 44 | 1 | 0 | 8.666418   | -1.921536 | -0.903505 |

-----  
 SCF Done: E(RB3LYP) = -1299.46431300 A.U. after 1 cycles  
 Convrg = 0.2561D-08 -V/T = 2.0143  
 Zero-point correction= 0.333242 (Hartree/Particle)  
 Thermal correction to Energy= 0.356992  
 Thermal correction to Enthalpy= 0.357936  
 Thermal correction to Gibbs Free Energy= 0.277640  
 Sum of electronic and zero-point Energies= -1299.131071  
 Sum of electronic and thermal Energies= -1299.107321  
 Sum of electronic and thermal Enthalpies= -1299.106377  
 Sum of electronic and thermal Free Energies= -1299.186673

### Structure 21

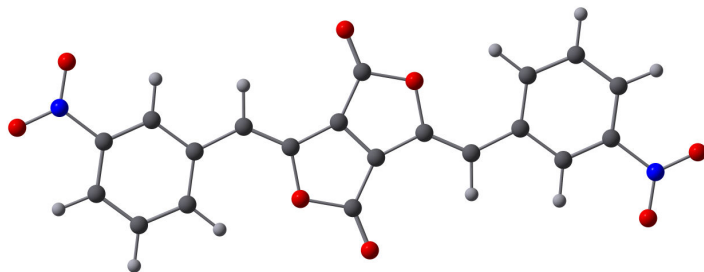

| Center Number | Atomic Number | Atomic Type | Coordinates (Angstroms) |           |           |
|---------------|---------------|-------------|-------------------------|-----------|-----------|
|               |               |             | X                       | Y         | Z         |
| 1             | 6             | 0           | 0.134843                | 1.798218  | -0.000642 |
| 2             | 6             | 0           | -0.491130               | 0.469222  | -0.000617 |
| 3             | 6             | 0           | 0.491130                | -0.469216 | -0.000636 |
| 4             | 6             | 0           | 1.775024                | 0.178121  | -0.000674 |
| 5             | 6             | 0           | -1.775024               | -0.178115 | -0.000433 |
| 6             | 6             | 0           | -0.134845               | -1.798212 | -0.000343 |
| 7             | 8             | 0           | -1.520368               | -1.550949 | -0.000502 |
| 8             | 8             | 0           | 1.520367                | 1.550956  | -0.000413 |
| 9             | 8             | 0           | -0.312506               | 2.918456  | -0.000116 |
| 10            | 8             | 0           | 0.312504                | -2.918450 | -0.000735 |
| 11            | 6             | 0           | -3.015239               | 0.366732  | -0.000329 |
| 12            | 1             | 0           | -3.019730               | 1.454187  | -0.000362 |
| 13            | 6             | 0           | -4.321292               | -0.279899 | -0.000178 |
| 14            | 6             | 0           | -5.455060               | 0.557374  | 0.000068  |
| 15            | 6             | 0           | -4.520778               | -1.681361 | -0.000310 |
| 16            | 6             | 0           | -6.728251               | -0.005474 | 0.000331  |
| 17            | 1             | 0           | -5.346839               | 1.636668  | 0.000095  |
| 18            | 6             | 0           | -5.807891               | -2.218055 | -0.000097 |
| 19            | 1             | 0           | -3.667891               | -2.349238 | -0.000573 |
| 20            | 6             | 0           | -6.931348               | -1.387713 | 0.000286  |

|    |   |   |           |           |           |
|----|---|---|-----------|-----------|-----------|
| 21 | 1 | 0 | -5.940265 | -3.296115 | -0.000214 |
| 22 | 6 | 0 | 3.015239  | -0.366726 | -0.000631 |
| 23 | 1 | 0 | 3.019729  | -1.454180 | -0.000745 |
| 24 | 6 | 0 | 4.321294  | 0.279903  | -0.000389 |
| 25 | 6 | 0 | 4.520789  | 1.681365  | -0.000552 |
| 26 | 6 | 0 | 5.455059  | -0.557376 | -0.000008 |
| 27 | 6 | 0 | 5.807904  | 2.218053  | -0.000236 |
| 28 | 1 | 0 | 3.667905  | 2.349246  | -0.000932 |
| 29 | 6 | 0 | 6.728250  | 0.005470  | 0.000348  |
| 30 | 1 | 0 | 5.346835  | -1.636670 | 0.000063  |
| 31 | 6 | 0 | 6.931358  | 1.387707  | 0.000272  |
| 32 | 1 | 0 | 5.940284  | 3.296113  | -0.000371 |
| 33 | 7 | 0 | -7.898884 | 0.889985  | 0.000739  |
| 34 | 8 | 0 | -7.697041 | 2.110127  | -0.000127 |
| 35 | 8 | 0 | -9.021819 | 0.372521  | 0.002017  |
| 36 | 7 | 0 | 7.898879  | -0.889994 | 0.000876  |
| 37 | 8 | 0 | 9.021816  | -0.372530 | 0.001996  |
| 38 | 8 | 0 | 7.697023  | -2.110137 | 0.000280  |
| 39 | 1 | 0 | -7.936951 | -1.792439 | 0.000536  |
| 40 | 1 | 0 | 7.936963  | 1.792425  | 0.000592  |

-----  
 SCF Done: E(RB3LYP) = -1479.45279680 A.U. after 1 cycles  
 Conv g = 0.5352D-08 -V/T = 2.0139  
 Zero-point correction= 0.272626 (Hartree/Particle)  
 Thermal correction to Energy= 0.296279  
 Thermal correction to Enthalpy= 0.297223  
 Thermal correction to Gibbs Free Energy= 0.215580  
 Sum of electronic and zero-point Energies= -1479.180170  
 Sum of electronic and thermal Energies= -1479.156518  
 Sum of electronic and thermal Enthalpies= -1479.155574  
 Sum of electronic and thermal Free Energies= -1479.237217

**Structure 22**

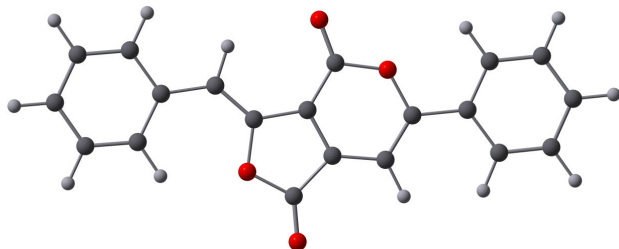

-----

| Center Number | Atomic Number | Atomic Type | Coordinates (Angstroms) |           |           |
|---------------|---------------|-------------|-------------------------|-----------|-----------|
|               |               |             | X                       | Y         | Z         |
| 1             | 6             | 0           | 0.543700                | -1.332882 | -0.000014 |
| 2             | 6             | 0           | -0.193719               | -0.088385 | -0.000021 |
| 3             | 6             | 0           | 0.472840                | 1.114928  | -0.000041 |
| 4             | 6             | 0           | 1.881904                | 1.218403  | -0.000069 |
| 5             | 6             | 0           | 2.591206                | 0.044074  | -0.000031 |
| 6             | 6             | 0           | -1.615606               | 0.159897  | -0.000015 |
| 7             | 6             | 0           | -0.551981               | 2.182033  | -0.000091 |
| 8             | 1             | 0           | 2.372310                | 2.183201  | -0.000126 |
| 9             | 8             | 0           | -1.788267               | 1.545440  | -0.000038 |
| 10            | 8             | 0           | 1.932584                | -1.157131 | 0.000033  |
| 11            | 8             | 0           | 0.114332                | -2.469230 | 0.000086  |
| 12            | 8             | 0           | -0.446968               | 3.387221  | -0.000177 |
| 13            | 6             | 0           | 4.054941                | -0.105433 | -0.000015 |
| 14            | 6             | 0           | 4.641101                | -1.387504 | -0.000261 |
| 15            | 6             | 0           | 4.898986                | 1.025139  | 0.000286  |
| 16            | 6             | 0           | 6.029504                | -1.531332 | -0.000232 |

-----

|    |   |   |           |           |           |
|----|---|---|-----------|-----------|-----------|
| 17 | 1 | 0 | 4.008408  | -2.268344 | -0.000479 |
| 18 | 6 | 0 | 6.284408  | 0.874798  | 0.000312  |
| 19 | 1 | 0 | 4.482331  | 2.027138  | 0.000528  |
| 20 | 6 | 0 | 6.857477  | -0.403783 | 0.000053  |
| 21 | 1 | 0 | 6.464749  | -2.527333 | -0.000425 |
| 22 | 1 | 0 | 6.919279  | 1.757119  | 0.000550  |
| 23 | 1 | 0 | 7.938537  | -0.517908 | 0.000082  |
| 24 | 6 | 0 | -2.641792 | -0.726195 | 0.000006  |
| 25 | 1 | 0 | -2.315211 | -1.762933 | 0.000072  |
| 26 | 6 | 0 | -4.081891 | -0.506600 | -0.000029 |
| 27 | 6 | 0 | -4.912437 | -1.651595 | 0.000070  |
| 28 | 6 | 0 | -4.698955 | 0.767025  | -0.000017 |
| 29 | 6 | 0 | -6.301782 | -1.534632 | 0.000084  |
| 30 | 1 | 0 | -4.455356 | -2.638680 | 0.000114  |
| 31 | 6 | 0 | -6.088917 | 0.877743  | 0.000012  |
| 32 | 1 | 0 | -4.091754 | 1.664466  | -0.000028 |
| 33 | 6 | 0 | -6.897265 | -0.267404 | 0.000053  |
| 34 | 1 | 0 | -6.919864 | -2.429077 | 0.000136  |
| 35 | 1 | 0 | -6.546881 | 1.863926  | 0.000009  |
| 36 | 1 | 0 | -7.980326 | -0.171756 | 0.000085  |

-----

SCF Done: E(RB3LYP) = -1070.39361812 A.U. after 1 cycles  
 Conv g = 0.9230D-08 -V/T = 2.0147  
 Zero-point correction= 0.268332 (Hartree/Particle)  
 Thermal correction to Energy= 0.286707  
 Thermal correction to Enthalpy= 0.287651  
 Thermal correction to Gibbs Free Energy= 0.217016  
 Sum of electronic and zero-point Energies= -1070.125286  
 Sum of electronic and thermal Energies= -1070.106911  
 Sum of electronic and thermal Enthalpies= -1070.105967  
 Sum of electronic and thermal Free Energies= -1070.176602

### Structure 23

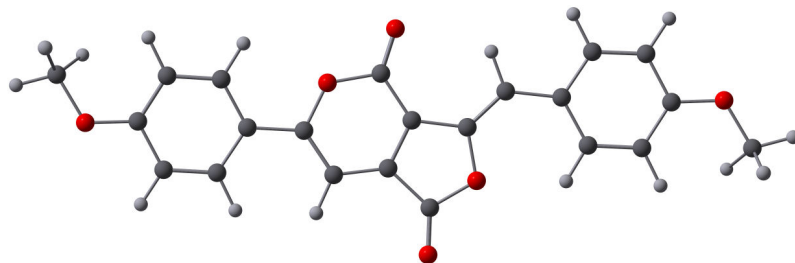

-----

| Center Number | Atomic Number | Atomic Type | Coordinates (Angstroms) |           |           |
|---------------|---------------|-------------|-------------------------|-----------|-----------|
|               |               |             | X                       | Y         | Z         |
| 1             | 6             | 0           | 0.523838                | -1.351155 | -0.018045 |
| 2             | 6             | 0           | -0.194778               | -0.097018 | 0.008077  |
| 3             | 6             | 0           | 0.492011                | 1.097692  | 0.034903  |
| 4             | 6             | 0           | 1.901439                | 1.178585  | 0.038288  |
| 5             | 6             | 0           | 2.594746                | -0.006764 | 0.005366  |
| 6             | 6             | 0           | -1.610160               | 0.172496  | 0.011458  |
| 7             | 6             | 0           | -0.515189               | 2.178730  | 0.057423  |
| 8             | 1             | 0           | 2.408856                | 2.133964  | 0.070700  |
| 9             | 8             | 0           | -1.760992               | 1.561615  | 0.040612  |
| 10            | 8             | 0           | 1.915225                | -1.198265 | -0.022449 |
| 11            | 8             | 0           | 0.077525                | -2.482118 | -0.039104 |
| 12            | 8             | 0           | -0.393857               | 3.383680  | 0.085612  |
| 13            | 6             | 0           | 4.049675                | -0.176719 | -0.002568 |
| 14            | 6             | 0           | 4.628579                | -1.458932 | 0.028378  |
| 15            | 6             | 0           | 4.917846                | 0.939570  | -0.040010 |
| 16            | 6             | 0           | 6.013178                | -1.634606 | 0.026098  |

-----

|    |   |   |           |           |           |
|----|---|---|-----------|-----------|-----------|
| 17 | 1 | 0 | 3.990205  | -2.335526 | 0.057871  |
| 18 | 6 | 0 | 6.293379  | 0.776677  | -0.042456 |
| 19 | 1 | 0 | 4.520348  | 1.949016  | -0.075734 |
| 20 | 6 | 0 | 6.858510  | -0.514243 | -0.008586 |
| 21 | 1 | 0 | 6.415732  | -2.641123 | 0.053327  |
| 22 | 1 | 0 | 6.955494  | 1.637447  | -0.074663 |
| 23 | 6 | 0 | -2.656396 | -0.692524 | -0.008781 |
| 24 | 1 | 0 | -2.351367 | -1.735684 | -0.027707 |
| 25 | 6 | 0 | -4.086687 | -0.444612 | -0.009083 |
| 26 | 6 | 0 | -4.950844 | -1.568518 | -0.027226 |
| 27 | 6 | 0 | -4.686256 | 0.834768  | 0.005871  |
| 28 | 6 | 0 | -6.329723 | -1.427817 | -0.031000 |
| 29 | 1 | 0 | -4.521370 | -2.567797 | -0.038259 |
| 30 | 6 | 0 | -6.072074 | 0.988319  | 0.001562  |
| 31 | 1 | 0 | -4.065936 | 1.723260  | 0.020746  |
| 32 | 6 | 0 | -6.906619 | -0.143510 | -0.017289 |
| 33 | 1 | 0 | -6.982285 | -2.296497 | -0.044464 |
| 34 | 1 | 0 | -6.489133 | 1.989465  | 0.012885  |
| 35 | 8 | 0 | 8.216755  | -0.565281 | -0.013684 |
| 36 | 8 | 0 | -8.266946 | -0.103625 | -0.023685 |
| 37 | 6 | 0 | -8.918027 | 1.171576  | -0.007931 |
| 38 | 1 | 0 | -9.988078 | 0.956257  | -0.014495 |
| 39 | 1 | 0 | -8.669399 | 1.736645  | 0.898093  |
| 40 | 1 | 0 | -8.663712 | 1.761785  | -0.896216 |
| 41 | 6 | 0 | 8.856737  | -1.846929 | 0.003533  |
| 42 | 1 | 0 | 8.593547  | -2.435738 | -0.883026 |
| 43 | 1 | 0 | 9.928427  | -1.640810 | -0.006348 |
| 44 | 1 | 0 | 8.605822  | -2.407251 | 0.911677  |

-----  
 SCF Done: E(RB3LYP) = -1299.48272101 A.U. after 1 cycles  
 Conv g = 0.3039D-08 -V/T = 2.0143  
 Zero-point correction= 0.333851 (Hartree/Particle)  
 Thermal correction to Energy= 0.357261  
 Thermal correction to Enthalpy= 0.358205  
 Thermal correction to Gibbs Free Energy= 0.279452  
 Sum of electronic and zero-point Energies= -1299.148870  
 Sum of electronic and thermal Energies= -1299.125460  
 Sum of electronic and thermal Enthalpies= -1299.124516  
 Sum of electronic and thermal Free Energies= -1299.203269

### Structure 24

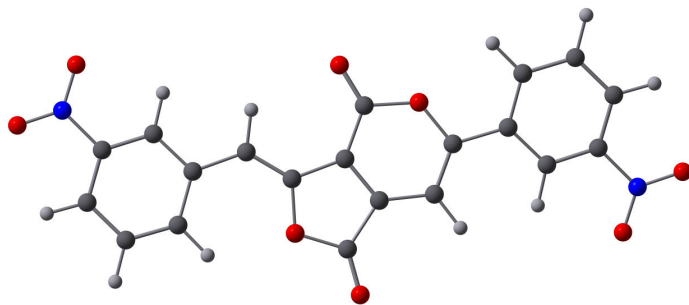

-----

| Center Number | Atomic Number | Atomic Type | Coordinates (Angstroms) |           |           |
|---------------|---------------|-------------|-------------------------|-----------|-----------|
|               |               |             | X                       | Y         | Z         |
| 1             | 6             | 0           | 0.523838                | -1.351155 | -0.018045 |
| 2             | 6             | 0           | -0.194778               | -0.097018 | 0.008077  |
| 3             | 6             | 0           | 0.492011                | 1.097692  | 0.034903  |
| 4             | 6             | 0           | 1.901439                | 1.178585  | 0.038288  |
| 5             | 6             | 0           | 2.594746                | -0.006764 | 0.005366  |
| 6             | 6             | 0           | -1.610160               | 0.172496  | 0.011458  |
| 7             | 6             | 0           | -0.515189               | 2.178730  | 0.057423  |

-----



|    |   |   |           |           |           |
|----|---|---|-----------|-----------|-----------|
| 8  | 1 | 0 | 2.408856  | 2.133964  | 0.070700  |
| 9  | 8 | 0 | -1.760992 | 1.561615  | 0.040612  |
| 10 | 8 | 0 | 1.915225  | -1.198265 | -0.022449 |
| 11 | 8 | 0 | 0.077525  | -2.482118 | -0.039104 |
| 12 | 8 | 0 | -0.393857 | 3.383680  | 0.085612  |
| 13 | 6 | 0 | 4.049675  | -0.176719 | -0.002568 |
| 14 | 6 | 0 | 4.628579  | -1.458932 | 0.028378  |
| 15 | 6 | 0 | 4.917846  | 0.939570  | -0.040010 |
| 16 | 6 | 0 | 6.013178  | -1.634606 | 0.026098  |
| 17 | 1 | 0 | 3.990205  | -2.335526 | 0.057871  |
| 18 | 6 | 0 | 6.293379  | 0.776677  | -0.042456 |
| 19 | 1 | 0 | 4.520348  | 1.949016  | -0.075734 |
| 20 | 6 | 0 | 6.858510  | -0.514243 | -0.008586 |
| 21 | 1 | 0 | 6.415732  | -2.641123 | 0.053327  |
| 22 | 1 | 0 | 6.955494  | 1.637447  | -0.074663 |
| 23 | 6 | 0 | -2.656396 | -0.692524 | -0.008781 |
| 24 | 1 | 0 | -2.351367 | -1.735684 | -0.027707 |
| 25 | 6 | 0 | -4.086687 | -0.444612 | -0.009083 |
| 26 | 6 | 0 | -4.950844 | -1.568518 | -0.027226 |
| 27 | 6 | 0 | -4.686256 | 0.834768  | 0.005871  |
| 28 | 6 | 0 | -6.329723 | -1.427817 | -0.031000 |
| 29 | 1 | 0 | -4.521370 | -2.567797 | -0.038259 |
| 30 | 6 | 0 | -6.072074 | 0.988319  | 0.001562  |
| 31 | 1 | 0 | -4.065936 | 1.723260  | 0.020746  |
| 32 | 6 | 0 | -6.906619 | -0.143510 | -0.017289 |
| 33 | 1 | 0 | -6.982285 | -2.296497 | -0.044464 |
| 34 | 1 | 0 | -6.489133 | 1.989465  | 0.012885  |
| 35 | 8 | 0 | 8.216755  | -0.565281 | -0.013684 |
| 36 | 8 | 0 | -8.266946 | -0.103625 | -0.023685 |
| 37 | 6 | 0 | -8.918027 | 1.171576  | -0.007931 |
| 38 | 1 | 0 | -9.988078 | 0.956257  | -0.014495 |
| 39 | 1 | 0 | -8.669399 | 1.736645  | 0.898093  |
| 40 | 1 | 0 | -8.663712 | 1.761785  | -0.896216 |
| 41 | 6 | 0 | 8.856737  | -1.846929 | 0.003533  |
| 42 | 1 | 0 | 8.593547  | -2.435738 | -0.883026 |
| 43 | 1 | 0 | 9.928427  | -1.640810 | -0.006348 |
| 44 | 1 | 0 | 8.605822  | -2.407251 | 0.911677  |

-----  
 SCF Done: E(RB3LYP) = -1479.47163641 A.U. after 1 cycles  
           Convq = 0.8110D-08 -V/T = 2.0139Zero-point  
 correction= 0.273272 (Hartree/Particle)  
 Thermal correction to Energy= 0.296730  
 Thermal correction to Enthalpy= 0.297674  
 Thermal correction to Gibbs Free Energy= 0.216468  
 Sum of electronic and zero-point Energies= -1479.198364  
 Sum of electronic and thermal Energies= -1479.174906  
 Sum of electronic and thermal Enthalpies= -1479.173962  
 Sum of electronic and thermal Free Energies= -1479.255168

### Structure 25

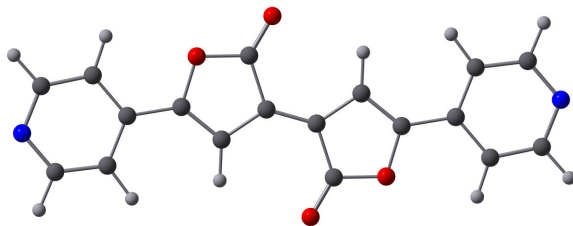

-----  

| Center<br>Number | Atomic<br>Number | Atomic<br>Type | Coordinates (Angstroms) |   |   |
|------------------|------------------|----------------|-------------------------|---|---|
|                  |                  |                | X                       | Y | Z |

 -----

|    |   |   |           |           |           |
|----|---|---|-----------|-----------|-----------|
| 1  | 6 | 0 | 1.117091  | -1.606481 | -0.000118 |
| 2  | 6 | 0 | 0.662529  | -0.186828 | -0.000079 |
| 3  | 6 | 0 | 1.854098  | 0.602687  | -0.000094 |
| 4  | 6 | 0 | 2.915666  | -0.258672 | -0.000046 |
| 5  | 8 | 0 | 2.507282  | -1.586095 | -0.000018 |
| 6  | 1 | 0 | 1.904638  | 1.681995  | -0.000101 |
| 7  | 6 | 0 | -0.662529 | 0.186828  | -0.000057 |
| 8  | 6 | 0 | -1.117091 | 1.606481  | -0.000038 |
| 9  | 6 | 0 | -1.854098 | -0.602687 | -0.000052 |
| 10 | 8 | 0 | -2.507282 | 1.586094  | 0.000000  |
| 11 | 6 | 0 | -2.915666 | 0.258671  | -0.000018 |
| 12 | 1 | 0 | -1.904637 | -1.681995 | -0.000068 |
| 13 | 8 | 0 | 0.499104  | -2.646136 | 0.000005  |
| 14 | 8 | 0 | -0.499104 | 2.646136  | -0.000011 |
| 15 | 6 | 0 | -4.351901 | 0.024694  | 0.000006  |
| 16 | 6 | 0 | -4.880193 | -1.280959 | -0.000012 |
| 17 | 6 | 0 | -5.261803 | 1.097053  | 0.000048  |
| 18 | 6 | 0 | -6.263718 | -1.445161 | 0.000012  |
| 19 | 1 | 0 | -4.234749 | -2.154158 | -0.000045 |
| 20 | 6 | 0 | -6.630232 | 0.816892  | 0.000069  |
| 21 | 1 | 0 | -4.915188 | 2.124974  | 0.000063  |
| 22 | 1 | 0 | -6.692845 | -2.445557 | -0.000001 |
| 23 | 1 | 0 | -7.351441 | 1.632567  | 0.000102  |
| 24 | 6 | 0 | 4.351901  | -0.024695 | -0.000001 |
| 25 | 6 | 0 | 5.261803  | -1.097053 | 0.000062  |
| 26 | 6 | 0 | 4.880193  | 1.280958  | -0.000017 |
| 27 | 6 | 0 | 6.630231  | -0.816893 | 0.000106  |
| 28 | 1 | 0 | 4.915187  | -2.124974 | 0.000078  |
| 29 | 6 | 0 | 6.263718  | 1.445160  | 0.000031  |
| 30 | 1 | 0 | 4.234750  | 2.154158  | -0.000065 |
| 31 | 1 | 0 | 7.351441  | -1.632568 | 0.000155  |
| 32 | 1 | 0 | 6.692845  | 2.445557  | 0.000019  |
| 33 | 7 | 0 | 7.137701  | 0.424126  | 0.000091  |
| 34 | 7 | 0 | -7.137701 | -0.424127 | 0.000053  |

-----  
 SCF Done: E(RB3LYP) = -1102.46623866 A.U. after 1 cycles  
 Conv g = 0.3564D-08 -V/T = 2.0144  
 Zero-point correction= 0.244376 (Hartree/Particle)  
 Thermal correction to Energy= 0.262519  
 Thermal correction to Enthalpy= 0.263463  
 Thermal correction to Gibbs Free Energy= 0.195569  
 Sum of electronic and zero-point Energies= -1102.221862  
 Sum of electronic and thermal Energies= -1102.203720  
 Sum of electronic and thermal Enthalpies= -1102.202776  
 Sum of electronic and thermal Free Energies= -1102.270670

### Structure 26

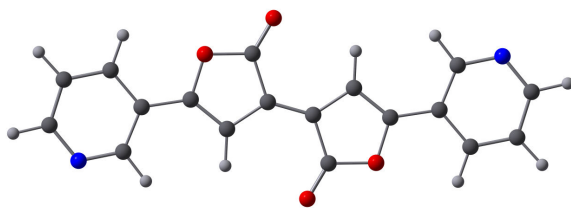

| Center Number | Atomic Number | Atomic Type | Coordinates (Angstroms) |           |           |
|---------------|---------------|-------------|-------------------------|-----------|-----------|
|               |               |             | X                       | Y         | Z         |
| 1             | 6             | 0           | 1.115311                | -1.603780 | -0.000084 |
| 2             | 6             | 0           | 0.663371                | -0.186126 | -0.000057 |
| 3             | 6             | 0           | 1.854922                | 0.603212  | -0.000067 |
| 4             | 6             | 0           | 2.918734                | -0.256698 | -0.000033 |

|    |   |   |           |           |           |
|----|---|---|-----------|-----------|-----------|
| 5  | 8 | 0 | 2.507680  | -1.584216 | -0.000013 |
| 6  | 1 | 0 | 1.903596  | 1.682462  | -0.000072 |
| 7  | 6 | 0 | -0.663371 | 0.186126  | -0.000041 |
| 8  | 6 | 0 | -1.115311 | 1.603780  | -0.000028 |
| 9  | 6 | 0 | -1.854922 | -0.603212 | -0.000037 |
| 10 | 8 | 0 | -2.507680 | 1.584216  | -0.000003 |
| 11 | 6 | 0 | -2.918734 | 0.256698  | -0.000014 |
| 12 | 1 | 0 | -1.903596 | -1.682462 | -0.000048 |
| 13 | 8 | 0 | 0.498487  | -2.644665 | 0.000002  |
| 14 | 8 | 0 | -0.498487 | 2.644665  | -0.000011 |
| 15 | 6 | 0 | -4.354306 | 0.033063  | 0.000003  |
| 16 | 6 | 0 | -5.263748 | 1.108182  | 0.000032  |
| 17 | 6 | 0 | -6.629386 | 0.832351  | 0.000047  |
| 18 | 1 | 0 | -4.902885 | 2.131791  | 0.000041  |
| 19 | 1 | 0 | -7.362114 | 1.634426  | 0.000069  |
| 20 | 6 | 0 | 4.354306  | -0.033063 | 0.000001  |
| 21 | 6 | 0 | 5.263748  | -1.108182 | 0.000045  |
| 22 | 6 | 0 | 6.629386  | -0.832351 | 0.000077  |
| 23 | 1 | 0 | 4.902885  | -2.131791 | 0.000055  |
| 24 | 1 | 0 | 7.362114  | -1.634426 | 0.000112  |
| 25 | 6 | 0 | -7.046700 | -0.501740 | 0.000034  |
| 26 | 1 | 0 | -8.106857 | -0.750205 | 0.000046  |
| 27 | 6 | 0 | 7.046700  | 0.501740  | 0.000063  |
| 28 | 1 | 0 | 8.106857  | 0.750205  | 0.000087  |
| 29 | 7 | 0 | -6.194157 | -1.542085 | 0.000007  |
| 30 | 7 | 0 | 6.194157  | 1.542085  | 0.000020  |
| 31 | 6 | 0 | -4.887174 | -1.274556 | -0.000008 |
| 32 | 1 | 0 | -4.224678 | -2.138619 | -0.000030 |
| 33 | 6 | 0 | 4.887174  | 1.274555  | -0.000010 |
| 34 | 1 | 0 | 4.224678  | 2.138618  | -0.000045 |

-----  
 SCF Done: E(RB3LYP) = -1102.46777462 A.U. after 1 cycles  
           Convgt = 0.9524D-08 -V/T = 2.0145  
 Zero-point correction= 0.244382 (Hartree/Particle)  
 Thermal correction to Energy= 0.262562  
 Thermal correction to Enthalpy= 0.263506  
 Thermal correction to Gibbs Free Energy= 0.195657  
 Sum of electronic and zero-point Energies= -1102.223393  
 Sum of electronic and thermal Energies= -1102.205213  
 Sum of electronic and thermal Enthalpies= -1102.204268  
 Sum of electronic and thermal Free Energies= -1102.272117

### Structure 27

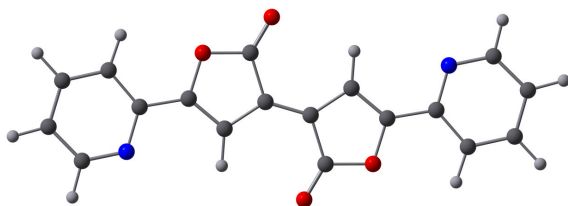

| Center Number | Atomic Number | Atomic Type | Coordinates (Angstroms) |           |           |
|---------------|---------------|-------------|-------------------------|-----------|-----------|
|               |               |             | X                       | Y         | Z         |
| 1             | 6             | 0           | 1.096938                | -1.610182 | -0.102559 |
| 2             | 6             | 0           | 0.660651                | -0.185972 | -0.054933 |
| 3             | 6             | 0           | 1.860442                | 0.591317  | -0.041417 |
| 4             | 6             | 0           | 2.908596                | -0.282835 | -0.080847 |
| 5             | 8             | 0           | 2.491366                | -1.606459 | -0.119294 |
| 6             | 1             | 0           | 1.943634                | 1.667591  | -0.009275 |
| 7             | 6             | 0           | -0.662505               | 0.199335  | -0.033775 |
| 8             | 6             | 0           | -1.098748               | 1.623547  | 0.014102  |

|    |   |   |           |           |           |
|----|---|---|-----------|-----------|-----------|
| 9  | 6 | 0 | -1.862317 | -0.577914 | -0.047620 |
| 10 | 8 | 0 | -2.493195 | 1.619850  | 0.030807  |
| 11 | 6 | 0 | -2.910451 | 0.296265  | -0.008086 |
| 12 | 1 | 0 | -1.945534 | -1.654180 | -0.079972 |
| 13 | 8 | 0 | 0.470184  | -2.643844 | -0.124385 |
| 14 | 8 | 0 | -0.472000 | 2.657203  | 0.036206  |
| 15 | 6 | 0 | -4.348730 | 0.057129  | 0.003519  |
| 16 | 6 | 0 | -5.265496 | 1.120210  | 0.077858  |
| 17 | 6 | 0 | -6.034743 | -1.503926 | -0.044971 |
| 18 | 6 | 0 | -6.629234 | 0.821794  | 0.091344  |
| 19 | 1 | 0 | -4.913674 | 2.145507  | 0.123097  |
| 20 | 1 | 0 | -6.311449 | -2.556055 | -0.095868 |
| 21 | 1 | 0 | -7.365252 | 1.619755  | 0.148150  |
| 22 | 6 | 0 | 4.346858  | -0.043635 | -0.093059 |
| 23 | 6 | 0 | 5.263698  | -1.106746 | -0.166186 |
| 24 | 6 | 0 | 6.627408  | -0.808249 | -0.180063 |
| 25 | 1 | 0 | 4.911944  | -2.132122 | -0.210166 |
| 26 | 6 | 0 | 6.032773  | 1.517591  | -0.046499 |
| 27 | 1 | 0 | 7.363483  | -1.606222 | -0.235942 |
| 28 | 1 | 0 | 6.309399  | 2.569798  | 0.003166  |
| 29 | 7 | 0 | -4.728519 | -1.238570 | -0.057582 |
| 30 | 7 | 0 | 4.726561  | 1.252154  | -0.033474 |
| 31 | 6 | 0 | -7.027494 | -0.514382 | 0.030432  |
| 32 | 1 | 0 | -8.077143 | -0.794173 | 0.038374  |
| 33 | 6 | 0 | 7.025585  | 0.528028  | -0.120716 |
| 34 | 1 | 0 | 8.075217  | 0.807871  | -0.128986 |

```

-----
SCF Done: E(RB3LYP) = -1102.47184759 A.U. after 1 cycles
              Convgt = 0.9390D-08 -V/T = 2.0145
Zero-point correction= 0.243633 (Hartree/Particle)
Thermal correction to Energy= 0.261880
Thermal correction to Enthalpy= 0.262824
Thermal correction to Gibbs Free Energy= 0.194628
Sum of electronic and zero-point Energies= -1102.228215
Sum of electronic and thermal Energies= -1102.209967
Sum of electronic and thermal Enthalpies= -1102.209023
Sum of electronic and thermal Free Energies= -1102.277219
    
```

### Structure 28

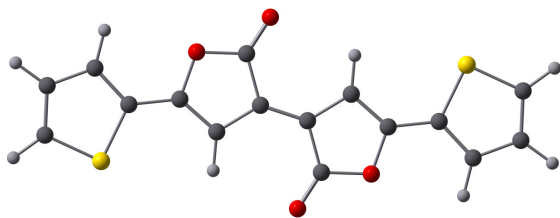

| Center Number | Atomic Number | Atomic Type | Coordinates (Angstroms) |           |           |
|---------------|---------------|-------------|-------------------------|-----------|-----------|
|               |               |             | X                       | Y         | Z         |
| 1             | 6             | 0           | -1.049035               | -1.644225 | -0.002288 |
| 2             | 6             | 0           | -0.657240               | -0.212142 | -0.002032 |
| 3             | 6             | 0           | -1.875476               | 0.528667  | -0.002411 |
| 4             | 6             | 0           | -2.906510               | -0.375508 | -0.001252 |
| 5             | 8             | 0           | -2.442815               | -1.686952 | -0.000369 |
| 6             | 1             | 0           | -1.968782               | 1.606047  | -0.002904 |
| 7             | 6             | 0           | 0.657240                | 0.212142  | -0.001935 |
| 8             | 6             | 0           | 1.049035                | 1.644225  | -0.002302 |
| 9             | 6             | 0           | 1.875476                | -0.528667 | -0.001990 |
| 10            | 8             | 0           | 2.442815                | 1.686952  | 0.000009  |
| 11            | 6             | 0           | 2.906510                | 0.375508  | -0.000656 |
| 12            | 1             | 0           | 1.968783                | -1.606047 | -0.002341 |

|    |    |   |           |           |           |
|----|----|---|-----------|-----------|-----------|
| 13 | 8  | 0 | -0.388935 | -2.659026 | 0.000321  |
| 14 | 8  | 0 | 0.388934  | 2.659026  | 0.000149  |
| 15 | 6  | 0 | 4.330416  | 0.221307  | 0.000488  |
| 16 | 6  | 0 | 5.281125  | 1.231310  | 0.001963  |
| 17 | 16 | 0 | 5.097258  | -1.354929 | 0.000119  |
| 18 | 6  | 0 | 6.613044  | 0.738282  | 0.002797  |
| 19 | 1  | 0 | 5.017613  | 2.283400  | 0.002411  |
| 20 | 6  | 0 | 6.669829  | -0.635675 | 0.001956  |
| 21 | 1  | 0 | 7.495666  | 1.369772  | 0.003968  |
| 22 | 1  | 0 | 7.548917  | -1.269841 | 0.002306  |
| 23 | 6  | 0 | -4.330416 | -0.221307 | -0.000485 |
| 24 | 6  | 0 | -5.281126 | -1.231310 | 0.000758  |
| 25 | 16 | 0 | -5.097258 | 1.354929  | -0.001102 |
| 26 | 6  | 0 | -6.613045 | -0.738282 | 0.001220  |
| 27 | 1  | 0 | -5.017614 | -2.283400 | 0.001298  |
| 28 | 6  | 0 | -6.669829 | 0.635675  | 0.000326  |
| 29 | 1  | 0 | -7.495667 | -1.369772 | 0.002170  |
| 30 | 1  | 0 | -7.548918 | 1.269841  | 0.000422  |

-----  
 SCF Done: E(RB3LYP) = -1711.83428348 A.U. after 1 cycles  
           Convq = 0.5296D-08 -V/T = 2.0103  
 Zero-point correction= 0.199901 (Hartree/Particle)  
 Thermal correction to Energy= 0.217817  
 Thermal correction to Enthalpy= 0.218762  
 Thermal correction to Gibbs Free Energy= 0.150157  
 Sum of electronic and zero-point Energies= -1711.634382  
 Sum of electronic and thermal Energies= -1711.616466  
 Sum of electronic and thermal Enthalpies= -1711.615522  
 Sum of electronic and thermal Free Energies= -1711.684127

### Structure 29

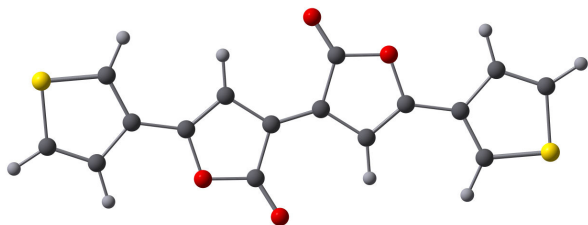

| Center Number | Atomic Number | Atomic Type | Coordinates (Angstroms) |           |           |
|---------------|---------------|-------------|-------------------------|-----------|-----------|
|               |               |             | X                       | Y         | Z         |
| 1             | 6             | 0           | -1.074698               | -1.630519 | -0.064396 |
| 2             | 6             | 0           | -0.658937               | -0.204765 | -0.023303 |
| 3             | 6             | 0           | -1.868038               | 0.554631  | -0.000616 |
| 4             | 6             | 0           | -2.911096               | -0.331111 | -0.019713 |
| 5             | 8             | 0           | -2.467834               | -1.648766 | -0.063942 |
| 6             | 1             | 0           | -1.944997               | 1.632146  | 0.025990  |
| 7             | 6             | 0           | 0.660948                | 0.198050  | -0.004572 |
| 8             | 6             | 0           | 1.076266                | 1.623825  | 0.041068  |
| 9             | 6             | 0           | 1.870084                | -0.561560 | -0.006718 |
| 10            | 8             | 0           | 2.469126                | 1.641636  | 0.070263  |
| 11            | 6             | 0           | 2.912650                | 0.323701  | 0.044023  |
| 12            | 1             | 0           | 1.947418                | -1.639042 | -0.033592 |
| 13            | 8             | 0           | -0.431465               | -2.656385 | -0.092243 |
| 14            | 8             | 0           | 0.432976                | 2.649924  | 0.053803  |
| 15            | 6             | 0           | 4.345743                | 0.138457  | 0.083181  |
| 16            | 6             | 0           | 5.297408                | 1.219662  | 0.139656  |
| 17            | 6             | 0           | 6.590476                | 0.780751  | 0.172845  |
| 18            | 1             | 0           | 5.017985                | 2.267228  | 0.153552  |
| 19            | 1             | 0           | 7.498867                | 1.369687  | 0.216112  |

|    |    |   |           |           |           |
|----|----|---|-----------|-----------|-----------|
| 20 | 6  | 0 | -4.344768 | -0.147302 | 0.001772  |
| 21 | 6  | 0 | -5.296961 | -1.223010 | -0.115833 |
| 22 | 6  | 0 | -6.590643 | -0.787353 | -0.071776 |
| 23 | 1  | 0 | -5.017215 | -2.264473 | -0.228795 |
| 24 | 1  | 0 | -7.499098 | -1.373888 | -0.138742 |
| 25 | 6  | 0 | -4.968099 | 1.082473  | 0.136666  |
| 26 | 6  | 0 | 4.968639  | -1.098921 | 0.078023  |
| 27 | 1  | 0 | -4.507110 | 2.056003  | 0.251903  |
| 28 | 1  | 0 | 4.508452  | -2.078702 | 0.041614  |
| 29 | 16 | 0 | -6.681534 | 0.937761  | 0.118006  |
| 30 | 16 | 0 | 6.680731  | -0.954496 | 0.138280  |

```

-----
SCF Done: E(RB3LYP) = -1711.83136356 A.U. after 1 cycles
          Conv = 0.4311D-08 -V/T = 2.0103
Zero-point correction= 0.199718 (Hartree/Particle)
Thermal correction to Energy= 0.217652
Thermal correction to Enthalpy= 0.218596
Thermal correction to Gibbs Free Energy= 0.150248
Sum of electronic and zero-point Energies= -1711.631646
Sum of electronic and thermal Energies= -1711.613712
Sum of electronic and thermal Enthalpies= -1711.612768
Sum of electronic and thermal Free Energies= -1711.681116
    
```

### Structure 30

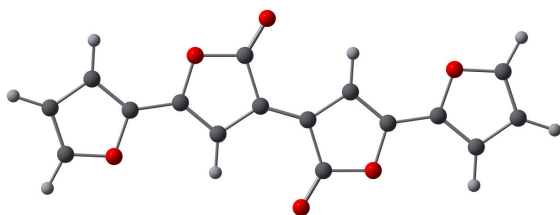

| Center Number | Atomic Number | Atomic Type | Coordinates (Angstroms) |           |           |
|---------------|---------------|-------------|-------------------------|-----------|-----------|
|               |               |             | X                       | Y         | Z         |
| 1             | 6             | 0           | -1.098560               | -1.608153 | 0.097488  |
| 2             | 6             | 0           | -0.663747               | -0.188997 | 0.027549  |
| 3             | 6             | 0           | -1.858803               | 0.590184  | 0.005955  |
| 4             | 6             | 0           | -2.910596               | -0.286449 | 0.059627  |
| 5             | 8             | 0           | -2.495396               | -1.608059 | 0.115298  |
| 6             | 1             | 0           | -1.931935               | 1.667063  | -0.041765 |
| 7             | 6             | 0           | 0.664240                | 0.192947  | -0.003918 |
| 8             | 6             | 0           | 1.099144                | 1.612076  | -0.073597 |
| 9             | 6             | 0           | 1.859256                | -0.586284 | 0.018256  |
| 10            | 8             | 0           | 2.495992                | 1.611900  | -0.091119 |
| 11            | 6             | 0           | 2.911125                | 0.290269  | -0.035253 |
| 12            | 1             | 0           | 1.932301                | -1.663154 | 0.066122  |
| 13            | 8             | 0           | -0.472130               | -2.642953 | 0.134777  |
| 14            | 8             | 0           | 0.472741                | 2.646858  | -0.111729 |
| 15            | 6             | 0           | 4.323602                | 0.083986  | -0.041904 |
| 16            | 6             | 0           | 5.391238                | 0.956227  | -0.100198 |
| 17            | 6             | 0           | 6.567584                | 0.149893  | -0.073155 |
| 18            | 1             | 0           | 5.327708                | 2.034934  | -0.156266 |
| 19            | 6             | 0           | 6.139741                | -1.149092 | 0.001890  |
| 20            | 1             | 0           | 7.596631                | 0.484005  | -0.103158 |
| 21            | 1             | 0           | 6.654857                | -2.099300 | 0.047282  |
| 22            | 6             | 0           | -4.323077               | -0.080351 | 0.067041  |
| 23            | 6             | 0           | -5.390496               | -0.952784 | 0.126371  |
| 24            | 6             | 0           | -6.567003               | -0.146680 | 0.099676  |
| 25            | 1             | 0           | -5.326738               | -2.031482 | 0.182176  |
| 26            | 6             | 0           | -6.139430               | 1.152420  | 0.025043  |
| 27            | 1             | 0           | -7.595975               | -0.480978 | 0.130195  |

|    |   |   |           |           |           |
|----|---|---|-----------|-----------|-----------|
| 28 | 1 | 0 | -6.654770 | 2.102524  | -0.019838 |
| 29 | 8 | 0 | -4.779159 | 1.213948  | 0.004533  |
| 30 | 8 | 0 | 4.779446  | -1.210380 | 0.021104  |

```

-----
SCF Done: E(RB3LYP) = -1065.95951194 A.U. after 1 cycles
          Convrg = 0.8526D-08 -V/T = 2.0139
Zero-point correction= 0.206606 (Hartree/Particle)
Thermal correction to Energy= 0.223500
Thermal correction to Enthalpy= 0.224444
Thermal correction to Gibbs Free Energy= 0.159547
Sum of electronic and zero-point Energies= -1065.752906
Sum of electronic and thermal Energies= -1065.736012
Sum of electronic and thermal Enthalpies= -1065.735068
Sum of electronic and thermal Free Energies= -1065.799965
    
```

### Structure 31

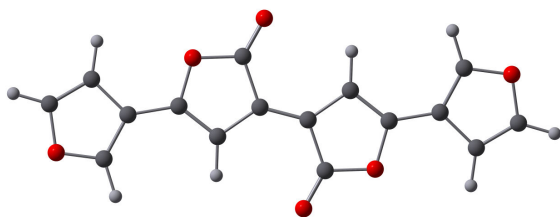

| Center Number | Atomic Number | Atomic Type | Coordinates (Angstroms) |           |           |
|---------------|---------------|-------------|-------------------------|-----------|-----------|
|               |               |             | X                       | Y         | Z         |
| 1             | 6             | 0           | 1.145206                | 1.580092  | 0.082369  |
| 2             | 6             | 0           | 0.667366                | 0.172808  | 0.079865  |
| 3             | 6             | 0           | 1.843113                | -0.638806 | 0.084678  |
| 4             | 6             | 0           | 2.922221                | 0.201974  | 0.091176  |
| 5             | 8             | 0           | 2.538639                | 1.537486  | 0.092587  |
| 6             | 1             | 0           | 1.876717                | -1.719006 | 0.089013  |
| 7             | 6             | 0           | -0.668613               | -0.172451 | 0.082919  |
| 8             | 6             | 0           | -1.146165               | -1.579753 | 0.098487  |
| 9             | 6             | 0           | -1.844515               | 0.638977  | 0.083922  |
| 10            | 8             | 0           | -2.539533               | -1.537314 | 0.112128  |
| 11            | 6             | 0           | -2.923428               | -0.201933 | 0.100401  |
| 12            | 1             | 0           | -1.878343               | 1.719173  | 0.079327  |
| 13            | 8             | 0           | 0.548914                | 2.634099  | 0.078373  |
| 14            | 8             | 0           | -0.549667               | -2.633657 | 0.101475  |
| 15            | 6             | 0           | -4.344157               | 0.038000  | 0.111683  |
| 16            | 6             | 0           | -5.394737               | -0.950927 | 0.210397  |
| 17            | 6             | 0           | -6.565376               | -0.260825 | 0.189764  |
| 18            | 1             | 0           | -5.273869               | -2.023164 | 0.286009  |
| 19            | 1             | 0           | -7.605582               | -0.552051 | 0.237896  |
| 20            | 6             | 0           | 4.342868                | -0.038417 | 0.100923  |
| 21            | 6             | 0           | 5.394216                | 0.950801  | 0.187686  |
| 22            | 6             | 0           | 6.564436                | 0.259891  | 0.170847  |
| 23            | 1             | 0           | 5.274092                | 2.023771  | 0.253277  |
| 24            | 1             | 0           | 7.604913                | 0.550996  | 0.213519  |
| 25            | 8             | 0           | 6.324426                | -1.089360 | 0.078119  |
| 26            | 6             | 0           | 4.981230                | -1.257791 | 0.036440  |
| 27            | 6             | 0           | -4.983339               | 1.256341  | 0.037092  |
| 28            | 1             | 0           | 4.629009                | -2.277516 | -0.040399 |
| 29            | 1             | 0           | -4.631822               | 2.275430  | -0.050750 |
| 30            | 8             | 0           | -6.326338               | 1.087634  | 0.083740  |

```

-----
SCF Done: E(RB3LYP) = -1065.95073283 A.U. after 1 cycles
          Convrg = 0.6730D-08 -V/T = 2.0139
Zero-point correction= 0.206649 (Hartree/Particle)
Thermal correction to Energy= 0.223643
    
```

Thermal correction to Enthalpy= 0.224587  
 Thermal correction to Gibbs Free Energy= 0.158865  
 Sum of electronic and zero-point Energies= -1065.744083  
 Sum of electronic and thermal Energies= -1065.727090  
 Sum of electronic and thermal Enthalpies= -1065.726146  
 Sum of electronic and thermal Free Energies= -1065.791868

**Structure 32**

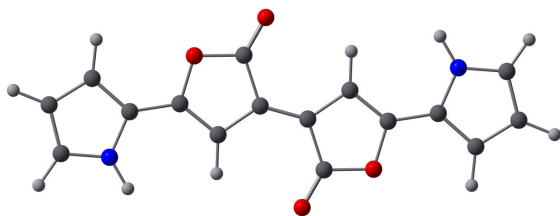

| Center Number | Atomic Number | Atomic Type | Coordinates (Angstroms) |           |           |
|---------------|---------------|-------------|-------------------------|-----------|-----------|
|               |               |             | X                       | Y         | Z         |
| 1             | 6             | 0           | -1.013320               | -1.663413 | 0.000033  |
| 2             | 6             | 0           | -0.653807               | -0.225800 | 0.000011  |
| 3             | 6             | 0           | -1.888682               | 0.487597  | -0.000157 |
| 4             | 6             | 0           | -2.899859               | -0.441924 | -0.000300 |
| 5             | 8             | 0           | -2.404977               | -1.739933 | -0.000220 |
| 6             | 1             | 0           | -2.001998               | 1.562661  | -0.000195 |
| 7             | 6             | 0           | 0.653807                | 0.225800  | 0.000149  |
| 8             | 6             | 0           | 1.013320                | 1.663414  | 0.000150  |
| 9             | 6             | 0           | 1.888682                | -0.487597 | 0.000336  |
| 10            | 8             | 0           | 2.404977                | 1.739933  | 0.000254  |
| 11            | 6             | 0           | 2.899859                | 0.441924  | 0.000391  |
| 12            | 1             | 0           | 2.001998                | -1.562661 | 0.000405  |
| 13            | 8             | 0           | -0.329107               | -2.664936 | 0.000060  |
| 14            | 8             | 0           | 0.329106                | 2.664936  | -0.000069 |
| 15            | 6             | 0           | 4.321185                | 0.319790  | 0.000553  |
| 16            | 6             | 0           | 5.310118                | 1.311938  | 0.000635  |
| 17            | 6             | 0           | 6.565576                | 0.662198  | 0.000682  |
| 18            | 1             | 0           | 5.121379                | 2.377519  | 0.000589  |
| 19            | 6             | 0           | 6.323314                | -0.708886 | 0.000619  |
| 20            | 1             | 0           | 7.541527                | 1.130851  | 0.000687  |
| 21            | 1             | 0           | 7.008683                | -1.546373 | 0.000594  |
| 22            | 6             | 0           | -4.321185               | -0.319790 | -0.000522 |
| 23            | 6             | 0           | -5.310119               | -1.311938 | -0.000666 |
| 24            | 6             | 0           | -6.565576               | -0.662198 | -0.000810 |
| 25            | 1             | 0           | -5.121380               | -2.377519 | -0.000631 |
| 26            | 6             | 0           | -6.323315               | 0.708886  | -0.000748 |
| 27            | 1             | 0           | -7.541527               | -1.130851 | -0.000915 |
| 28            | 1             | 0           | -7.008683               | 1.546373  | -0.000802 |
| 29            | 7             | 0           | 4.971480                | -0.904319 | 0.000757  |
| 30            | 7             | 0           | -4.971480               | 0.904319  | -0.000667 |
| 31            | 1             | 0           | 4.518213                | -1.810360 | 0.001004  |
| 32            | 1             | 0           | -4.518214               | 1.810360  | -0.000715 |

SCF Done: E(RB3LYP) = -1026.24802616 A.U. after 1 cycles  
 Convq = 0.5294D-08 -V/T = 2.0143  
 Zero-point correction= 0.231690 (Hartree/Particle)  
 Thermal correction to Energy= 0.249060  
 Thermal correction to Enthalpy= 0.250004  
 Thermal correction to Gibbs Free Energy= 0.183839  
 Sum of electronic and zero-point Energies= -1026.016336  
 Sum of electronic and thermal Energies= -1025.998966  
 Sum of electronic and thermal Enthalpies= -1025.998022  
 Sum of electronic and thermal Free Energies= -1026.064187



**Structure 33**

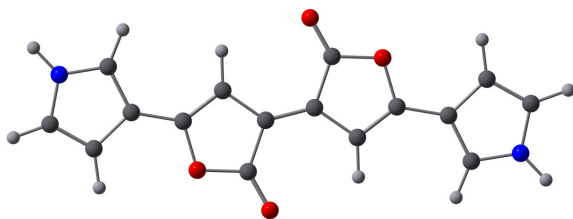

| Center Number | Atomic Number | Atomic Type | Coordinates (Angstroms) |           |           |
|---------------|---------------|-------------|-------------------------|-----------|-----------|
|               |               |             | X                       | Y         | Z         |
| 1             | 6             | 0           | -1.060822               | -1.638356 | -0.025763 |
| 2             | 6             | 0           | -0.659118               | -0.211561 | 0.029551  |
| 3             | 6             | 0           | -1.875545               | 0.535482  | 0.046087  |
| 4             | 6             | 0           | -2.913334               | -0.359137 | 0.001751  |
| 5             | 8             | 0           | -2.452495               | -1.672370 | -0.043104 |
| 6             | 1             | 0           | -1.963585               | 1.611911  | 0.082586  |
| 7             | 6             | 0           | 0.659616                | 0.201628  | 0.053363  |
| 8             | 6             | 0           | 1.061199                | 1.628483  | 0.107575  |
| 9             | 6             | 0           | 1.876125                | -0.545323 | 0.037106  |
| 10            | 8             | 0           | 2.452868                | 1.662701  | 0.124034  |
| 11            | 6             | 0           | 2.913827                | 0.349446  | 0.080474  |
| 12            | 1             | 0           | 1.964239                | -1.621760 | 0.001138  |
| 13            | 8             | 0           | -0.406842               | -2.659955 | -0.053017 |
| 14            | 8             | 0           | 0.407070                | 2.650000  | 0.134181  |
| 15            | 6             | 0           | 4.341170                | 0.187544  | 0.091444  |
| 16            | 6             | 0           | 5.325552                | 1.233103  | 0.168266  |
| 17            | 6             | 0           | 6.563970                | 0.630841  | 0.157442  |
| 18            | 1             | 0           | 5.129135                | 2.295418  | 0.223569  |
| 19            | 1             | 0           | 7.559216                | 1.052046  | 0.198467  |
| 20            | 6             | 0           | -4.340646               | -0.196938 | -0.009736 |
| 21            | 6             | 0           | -5.325290               | -1.241805 | -0.092501 |
| 22            | 6             | 0           | -6.563525               | -0.639190 | -0.080352 |
| 23            | 1             | 0           | -5.129190               | -2.303939 | -0.152326 |
| 24            | 1             | 0           | -7.558859               | -1.059882 | -0.124415 |
| 25            | 6             | 0           | -5.036928               | 1.014616  | 0.048971  |
| 26            | 6             | 0           | 5.037776                | -1.024068 | 0.037776  |
| 27            | 1             | 0           | -4.680472               | 2.033380  | 0.118891  |
| 28            | 1             | 0           | 4.681580                | -2.043284 | -0.026556 |
| 29            | 7             | 0           | -6.368199               | 0.726576  | 0.004901  |
| 30            | 7             | 0           | 6.369035                | -0.735303 | 0.077567  |
| 31            | 1             | 0           | 7.108565                | -1.426860 | 0.048544  |
| 32            | 1             | 0           | -7.107492               | 1.418359  | 0.034509  |

SCF Done: E(RB3LYP) = -1026.24584566 A.U. after 1 cycles  
 Convg = 0.3189D-08 -V/T = 2.0143  
 Zero-point correction= 0.231730 (Hartree/Particle)  
 Thermal correction to Energy= 0.249111  
 Thermal correction to Enthalpy= 0.250055  
 Thermal correction to Gibbs Free Energy= 0.184243  
 Sum of electronic and zero-point Energies= -1026.014116  
 Sum of electronic and thermal Energies= -1025.996735  
 Sum of electronic and thermal Enthalpies= -1025.995790  
 Sum of electronic and thermal Free Energies= -1026.061603

**Structure 34**

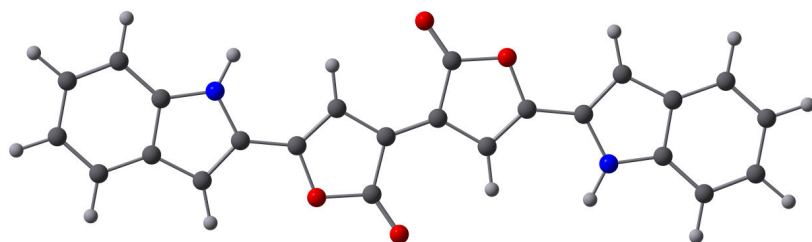

| Center Number | Atomic Number | Atomic Type | Coordinates (Angstroms) |           |           |
|---------------|---------------|-------------|-------------------------|-----------|-----------|
|               |               |             | X                       | Y         | Z         |
| 1             | 6             | 0           | 1.117811                | -1.594833 | -0.134477 |
| 2             | 6             | 0           | 0.663864                | -0.181938 | -0.144969 |
| 3             | 6             | 0           | 1.848457                | 0.609675  | -0.179915 |
| 4             | 6             | 0           | 2.917397                | -0.251437 | -0.190663 |
| 5             | 8             | 0           | 2.510904                | -1.578437 | -0.162694 |
| 6             | 1             | 0           | 1.891625                | 1.689793  | -0.194929 |
| 7             | 6             | 0           | -0.668918               | 0.187359  | -0.122654 |
| 8             | 6             | 0           | -1.122758               | 1.600277  | -0.131826 |
| 9             | 6             | 0           | -1.853552               | -0.604193 | -0.087644 |
| 10            | 8             | 0           | -2.515856               | 1.583996  | -0.102741 |
| 11            | 6             | 0           | -2.922422               | 0.257005  | -0.075732 |
| 12            | 1             | 0           | -1.896807               | -1.684310 | -0.072957 |
| 13            | 8             | 0           | 0.501788                | -2.638335 | -0.108705 |
| 14            | 8             | 0           | -0.506636               | 2.643703  | -0.157829 |
| 15            | 6             | 0           | -4.332514               | 0.030998  | -0.040074 |
| 16            | 6             | 0           | -5.367941               | 0.961966  | -0.046046 |
| 17            | 6             | 0           | -6.592831               | 0.232686  | -0.000288 |
| 18            | 1             | 0           | -5.240320               | 2.036144  | -0.079404 |
| 19            | 6             | 0           | -6.252215               | -1.155337 | 0.035136  |
| 20            | 6             | 0           | 4.327521                | -0.025475 | -0.225373 |
| 21            | 6             | 0           | 5.362925                | -0.956392 | -0.212841 |
| 22            | 6             | 0           | 6.587892                | -0.227351 | -0.260104 |
| 23            | 1             | 0           | 5.235242                | -2.030396 | -0.174440 |
| 24            | 6             | 0           | 6.247358                | 1.160515  | -0.302559 |
| 25            | 7             | 0           | -4.878380               | -1.248353 | 0.007939  |
| 26            | 7             | 0           | 4.873481                | 1.253683  | -0.277547 |
| 27            | 1             | 0           | -4.350310               | -2.111781 | 0.028253  |
| 28            | 1             | 0           | 4.345415                | 2.116911  | -0.305553 |
| 29            | 6             | 0           | 7.223215                | 2.166567  | -0.368256 |
| 30            | 6             | 0           | 8.555641                | 1.764218  | -0.386333 |
| 31            | 1             | 0           | 6.952705                | 3.219121  | -0.402444 |
| 32            | 1             | 0           | 9.337643                | 2.517888  | -0.435905 |
| 33            | 6             | 0           | 7.951551                | -0.601492 | -0.278651 |
| 34            | 6             | 0           | 8.917546                | 0.393608  | -0.342219 |
| 35            | 1             | 0           | 8.235289                | -1.650654 | -0.243344 |
| 36            | 1             | 0           | 9.970699                | 0.124847  | -0.358236 |
| 37            | 6             | 0           | -7.956473               | 0.606683  | 0.021920  |
| 38            | 6             | 0           | -8.922347               | -0.388771 | 0.081390  |
| 39            | 1             | 0           | -8.240168               | 1.656141  | -0.003507 |
| 40            | 1             | 0           | -9.975499               | -0.120146 | 0.099581  |
| 41            | 6             | 0           | -7.227930               | -2.161738 | 0.097199  |
| 42            | 6             | 0           | -8.560343               | -1.759541 | 0.118873  |
| 43            | 1             | 0           | -6.957311               | -3.214367 | 0.127841  |
| 44            | 1             | 0           | -9.342174               | -2.513372 | 0.168776  |

SCF Done: E(RB3LYP) = -1333.56793121 A.U. after 1 cycles  
 Convg = 0.2233D-08 -V/T = 2.0147  
 Zero-point correction= 0.324588 (Hartree/Particle)  
 Thermal correction to Energy= 0.347473  
 Thermal correction to Enthalpy= 0.348417

Thermal correction to Gibbs Free Energy= 0.269811  
 Sum of electronic and zero-point Energies= -1333.243343  
 Sum of electronic and thermal Energies= -1333.220458  
 Sum of electronic and thermal Enthalpies= -1333.219514  
 Sum of electronic and thermal Free Energies= -1333.298120

**Structure 35**

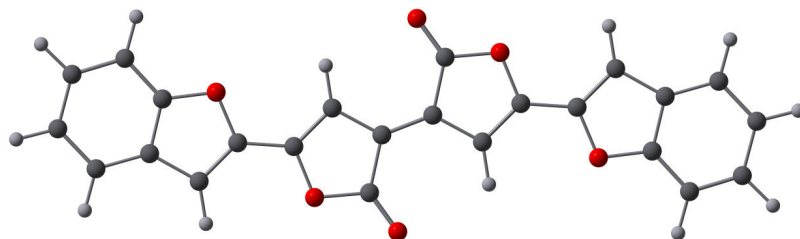

| Center Number | Atomic Number | Atomic Type | Coordinates (Angstroms) |           |           |
|---------------|---------------|-------------|-------------------------|-----------|-----------|
|               |               |             | X                       | Y         | Z         |
| 1             | 6             | 0           | -3.827829               | -3.026779 | 3.244525  |
| 2             | 6             | 0           | -4.295588               | -2.078343 | 4.289634  |
| 3             | 6             | 0           | -4.890228               | -0.984950 | 3.594124  |
| 4             | 6             | 0           | -4.783821               | -1.256529 | 2.254981  |
| 5             | 8             | 0           | -4.154385               | -2.466421 | 2.007755  |
| 6             | 1             | 0           | -5.340366               | -0.104272 | 4.029322  |
| 7             | 6             | 0           | -4.136238               | -2.306444 | 5.643595  |
| 8             | 6             | 0           | -4.603953               | -1.357984 | 6.688703  |
| 9             | 6             | 0           | -3.541612               | -3.399843 | 6.339109  |
| 10            | 8             | 0           | -4.277404               | -1.918340 | 7.925470  |
| 11            | 6             | 0           | -3.647971               | -3.128234 | 7.678250  |
| 12            | 1             | 0           | -3.091500               | -4.280538 | 5.903916  |
| 13            | 8             | 0           | -3.267845               | -4.096411 | 3.320317  |
| 14            | 8             | 0           | -5.163971               | -0.288368 | 6.612909  |
| 15            | 6             | 0           | -3.230016               | -3.863410 | 8.827815  |
| 16            | 6             | 0           | -3.338728               | -3.592120 | 10.171746 |
| 17            | 6             | 0           | -2.731096               | -4.698272 | 10.853290 |
| 18            | 1             | 0           | -3.795390               | -2.710486 | 10.602607 |
| 19            | 6             | 0           | -2.290445               | -5.576719 | 9.838450  |
| 20            | 6             | 0           | -5.201758               | -0.521331 | 1.105422  |
| 21            | 6             | 0           | -5.092999               | -0.792579 | -0.238515 |
| 22            | 6             | 0           | -5.700416               | 0.313697  | -0.920052 |
| 23            | 1             | 0           | -4.636285               | -1.674181 | -0.669386 |
| 24            | 6             | 0           | -6.141432               | 1.191937  | 0.094810  |
| 25            | 8             | 0           | -5.837124               | 0.684412  | 1.331784  |
| 26            | 8             | 0           | -2.594810               | -5.069242 | 8.601470  |
| 27            | 6             | 0           | -6.792762               | 2.395807  | -0.154664 |
| 28            | 6             | 0           | -7.002228               | 2.717175  | -1.498417 |
| 29            | 1             | 0           | -7.118911               | 3.046245  | 0.651663  |
| 30            | 1             | 0           | -7.507871               | 3.646278  | -1.748068 |
| 31            | 6             | 0           | -5.922304               | 0.661289  | -2.268648 |
| 32            | 6             | 0           | -6.572962               | 1.862114  | -2.539318 |
| 33            | 1             | 0           | -5.595287               | 0.008780  | -3.073993 |
| 34            | 1             | 0           | -6.756934               | 2.152940  | -3.570282 |
| 35            | 6             | 0           | -1.639146               | -6.780595 | 10.087939 |
| 36            | 6             | 0           | -1.429359               | -7.101778 | 11.431678 |
| 37            | 1             | 0           | -1.313276               | -7.431192 | 9.281628  |
| 38            | 1             | 0           | -0.923671               | -8.030856 | 11.681331 |
| 39            | 6             | 0           | -2.508953               | -5.045713 | 12.201881 |
| 40            | 6             | 0           | -1.858256               | -6.246514 | 12.472563 |
| 41            | 1             | 0           | -2.835653               | -4.393024 | 13.007209 |
| 42            | 1             | 0           | -1.674055               | -6.537210 | 13.503522 |

```
SCF Done: E(RB3LYP) = -1373.28874065 A.U. after 1 cycles
              Convgt = 0.5368D-08 -V/T = 2.0144
Zero-point correction= 0.300573 (Hartree/Particle)
Thermal correction to Energy= 0.322482
Thermal correction to Enthalpy= 0.323426
Thermal correction to Gibbs Free Energy= 0.247529
Sum of electronic and zero-point Energies= -1372.988168
Sum of electronic and thermal Energies= -1372.966259
Sum of electronic and thermal Enthalpies= -1372.965315
Sum of electronic and thermal Free Energies= -1373.041212
```

### Structure 36

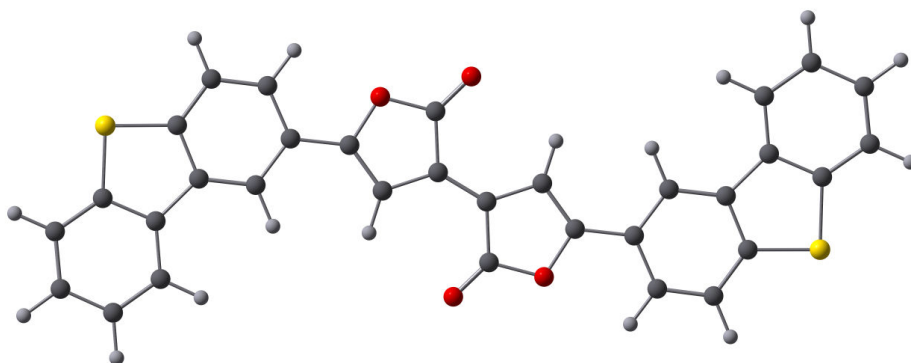

| Center Number | Atomic Number | Atomic Type | Coordinates (Angstroms) |           |           |
|---------------|---------------|-------------|-------------------------|-----------|-----------|
|               |               |             | X                       | Y         | Z         |
| 1             | 6             | 0           | -0.571450               | 1.858867  | -0.066741 |
| 2             | 6             | 0           | -0.575323               | 0.374128  | -0.094967 |
| 3             | 6             | 0           | -1.948863               | -0.012444 | -0.078215 |
| 4             | 6             | 0           | -2.703167               | 1.130819  | -0.041315 |
| 5             | 8             | 0           | -1.901501               | 2.268215  | -0.033407 |
| 6             | 1             | 0           | -2.322895               | -1.025913 | -0.091611 |
| 7             | 6             | 0           | 0.577448                | -0.385388 | -0.130955 |
| 8             | 6             | 0           | 0.575426                | -1.869775 | -0.173145 |
| 9             | 6             | 0           | 1.950320                | 0.003146  | -0.149957 |
| 10            | 8             | 0           | 1.905922                | -2.276817 | -0.223713 |
| 11            | 6             | 0           | 2.705889                | -1.138390 | -0.205700 |
| 12            | 1             | 0           | 2.322802                | 1.017023  | -0.129703 |
| 13            | 8             | 0           | 0.335181                | 2.662298  | -0.069697 |
| 14            | 8             | 0           | -0.330064               | -2.674438 | -0.170018 |
| 15            | 6             | 0           | 4.139652                | -1.355194 | -0.251014 |
| 16            | 6             | 0           | 5.024947                | -0.263661 | -0.177409 |
| 17            | 6             | 0           | 4.659994                | -2.669263 | -0.369273 |
| 18            | 6             | 0           | 6.405018                | -0.474899 | -0.219353 |
| 19            | 1             | 0           | 4.639916                | 0.748106  | -0.085067 |
| 20            | 6             | 0           | 6.030480                | -2.894953 | -0.415622 |
| 21            | 1             | 0           | 3.976673                | -3.509692 | -0.426027 |
| 22            | 6             | 0           | 6.898984                | -1.799280 | -0.339704 |
| 23            | 1             | 0           | 6.412658                | -3.908134 | -0.507602 |
| 24            | 6             | 0           | -4.136574               | 1.352479  | -0.009413 |
| 25            | 6             | 0           | -4.652774               | 2.673031  | 0.022367  |
| 26            | 6             | 0           | -5.025102               | 0.260912  | -0.010963 |
| 27            | 6             | 0           | -6.022412               | 2.906024  | 0.051818  |
| 28            | 1             | 0           | -3.966546               | 3.512976  | 0.023633  |
| 29            | 6             | 0           | -6.404524               | 0.479380  | 0.019365  |
| 30            | 1             | 0           | -4.643555               | -0.756181 | -0.035193 |
| 31            | 6             | 0           | -6.894215               | 1.810442  | 0.050146  |
| 32            | 1             | 0           | -6.401204               | 3.924312  | 0.075615  |
| 33            | 6             | 0           | 8.756140                | -0.100469 | -0.220299 |

|    |    |   |            |           |           |
|----|----|---|------------|-----------|-----------|
| 34 | 6  | 0 | 9.933459   | 0.653862  | -0.174661 |
| 35 | 6  | 0 | 7.481361   | 0.506078  | -0.148824 |
| 36 | 6  | 0 | 9.828203   | 2.040696  | -0.054220 |
| 37 | 1  | 0 | 10.908631  | 0.177027  | -0.230631 |
| 38 | 6  | 0 | 7.399592   | 1.904018  | -0.026899 |
| 39 | 6  | 0 | 8.568002   | 2.662541  | 0.018886  |
| 40 | 1  | 0 | 10.731759  | 2.643972  | -0.017162 |
| 41 | 1  | 0 | 6.429837   | 2.392184  | 0.031283  |
| 42 | 1  | 0 | 8.506111   | 3.743669  | 0.112288  |
| 43 | 6  | 0 | -8.757127  | 0.114242  | 0.058064  |
| 44 | 6  | 0 | -9.937109  | -0.637243 | 0.067738  |
| 45 | 6  | 0 | -7.484644  | -0.500237 | 0.024540  |
| 46 | 6  | 0 | -9.836788  | -2.029359 | 0.043011  |
| 47 | 1  | 0 | -10.910607 | -0.154237 | 0.093517  |
| 48 | 6  | 0 | -7.407861  | -1.903366 | 0.000139  |
| 49 | 6  | 0 | -8.578869  | -2.659199 | 0.009757  |
| 50 | 1  | 0 | -10.742435 | -2.630616 | 0.049995  |
| 51 | 1  | 0 | -6.439723  | -2.397205 | -0.025794 |
| 52 | 1  | 0 | -8.520924  | -3.744407 | -0.008748 |
| 53 | 16 | 0 | -8.651712  | 1.880629  | 0.085235  |
| 54 | 16 | 0 | 8.656812   | -1.861099 | -0.372680 |

-----  
 SCF Done: E(RB3LYP) = -2326.48949315 A.U. after 1 cycles  
 Conv g = 0.3432D-08 -V/T = 2.0118  
 Zero-point correction= 0.388213 (Hartree/Particle)  
 Thermal correction to Energy= 0.416835  
 Thermal correction to Enthalpy= 0.417779  
 Thermal correction to Gibbs Free Energy= 0.324750  
 Sum of electronic and zero-point Energies= -2326.101280  
 Sum of electronic and thermal Energies= -2326.072658  
 Sum of electronic and thermal Enthalpies= -2326.071714  
 Sum of electronic and thermal Free Energies= -2326.164743

### Structure 37

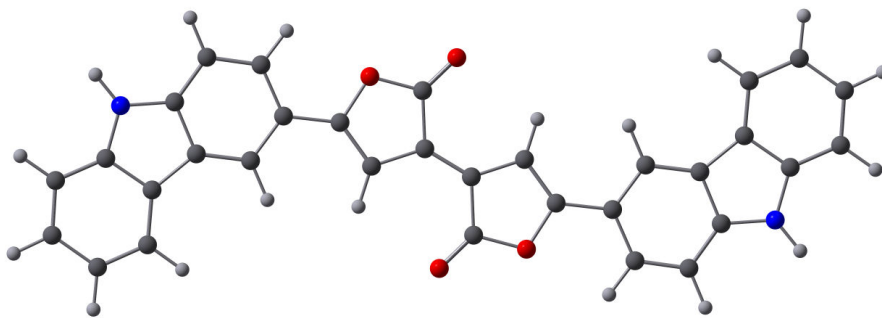

| Center Number | Atomic Number | Atomic Type | Coordinates (Angstroms) |           |           |
|---------------|---------------|-------------|-------------------------|-----------|-----------|
|               |               |             | X                       | Y         | Z         |
| 1             | 6             | 0           | -0.641861               | 1.838021  | 0.019732  |
| 2             | 6             | 0           | -0.591004               | 0.358887  | -0.073951 |
| 3             | 6             | 0           | -1.949051               | -0.077309 | -0.089085 |
| 4             | 6             | 0           | -2.748369               | 1.034655  | -0.010437 |
| 5             | 8             | 0           | -1.985786               | 2.198869  | 0.053777  |
| 6             | 1             | 0           | -2.283846               | -1.102510 | -0.150761 |
| 7             | 6             | 0           | 0.590712                | -0.357678 | -0.123939 |
| 8             | 6             | 0           | 0.641880                | -1.836856 | -0.216727 |
| 9             | 6             | 0           | 1.948659                | 0.078767  | -0.108336 |
| 10            | 8             | 0           | 1.985899                | -2.197534 | -0.249488 |
| 11            | 6             | 0           | 2.748221                | -1.033100 | -0.185645 |
| 12            | 1             | 0           | 2.283182                | 1.104041  | -0.046744 |
| 13            | 8             | 0           | 0.234665                | 2.674747  | 0.067871  |

|    |   |   |            |           |           |
|----|---|---|------------|-----------|-----------|
| 14 | 8 | 0 | -0.234528  | -2.673687 | -0.264987 |
| 15 | 6 | 0 | 4.186249   | -1.200717 | -0.213828 |
| 16 | 6 | 0 | 5.031876   | -0.072091 | -0.177777 |
| 17 | 6 | 0 | 4.753402   | -2.503421 | -0.277151 |
| 18 | 6 | 0 | 6.413198   | -0.248192 | -0.204945 |
| 19 | 1 | 0 | 4.610246   | 0.928088  | -0.131326 |
| 20 | 6 | 0 | 6.128427   | -2.699486 | -0.302392 |
| 21 | 1 | 0 | 4.092694   | -3.363185 | -0.306055 |
| 22 | 6 | 0 | 6.954867   | -1.567858 | -0.265273 |
| 23 | 1 | 0 | 6.544659   | -3.702452 | -0.349854 |
| 24 | 6 | 0 | -4.186351  | 1.202704  | 0.018974  |
| 25 | 6 | 0 | -4.752836  | 2.505527  | 0.086406  |
| 26 | 6 | 0 | -5.032514  | 0.074569  | -0.019181 |
| 27 | 6 | 0 | -6.127735  | 2.702155  | 0.113615  |
| 28 | 1 | 0 | -4.091706  | 3.364883  | 0.117027  |
| 29 | 6 | 0 | -6.413746  | 0.251203  | 0.010028  |
| 30 | 1 | 0 | -4.611311  | -0.925636 | -0.068993 |
| 31 | 6 | 0 | -6.954687  | 1.570987  | 0.074550  |
| 32 | 1 | 0 | -6.543478  | 3.705175  | 0.164248  |
| 33 | 7 | 0 | 8.331350   | -1.478895 | -0.277606 |
| 34 | 1 | 0 | 8.965544   | -2.266741 | -0.323329 |
| 35 | 7 | 0 | -8.331197  | 1.482670  | 0.088447  |
| 36 | 1 | 0 | -8.964914  | 2.270762  | 0.136570  |
| 37 | 6 | 0 | 8.716206   | -0.141171 | -0.229016 |
| 38 | 6 | 0 | 9.999835   | 0.415102  | -0.223104 |
| 39 | 6 | 0 | 7.546044   | 0.664116  | -0.182883 |
| 40 | 6 | 0 | 10.098809  | 1.807479  | -0.168782 |
| 41 | 1 | 0 | 10.889224  | -0.209557 | -0.258883 |
| 42 | 6 | 0 | 7.672590   | 2.060109  | -0.128928 |
| 43 | 6 | 0 | 8.949958   | 2.623496  | -0.122530 |
| 44 | 1 | 0 | 11.082771  | 2.269838  | -0.162758 |
| 45 | 1 | 0 | 6.791688   | 2.696741  | -0.092684 |
| 46 | 1 | 0 | 9.062974   | 3.703622  | -0.081068 |
| 47 | 6 | 0 | -8.716785  | 0.145306  | 0.036644  |
| 48 | 6 | 0 | -10.000703 | -0.410304 | 0.031081  |
| 49 | 6 | 0 | -7.547106  | -0.660478 | -0.013156 |
| 50 | 6 | 0 | -10.100498 | -1.802482 | -0.026799 |
| 51 | 1 | 0 | -10.889709 | 0.214723  | 0.069717  |
| 52 | 6 | 0 | -7.674484  | -2.056266 | -0.070610 |
| 53 | 6 | 0 | -8.952152  | -2.618980 | -0.076711 |
| 54 | 1 | 0 | -11.084709 | -2.264304 | -0.032685 |
| 55 | 1 | 0 | -6.793973  | -2.693276 | -0.109603 |
| 56 | 1 | 0 | -9.065785  | -3.698935 | -0.120794 |

-----  
SCF Done: E(RB3LYP) = -1640.89556239 A.U. after 1 cycles  
Convrg = 0.3315D-08 -V/T = 2.0149  
Zero-point correction= 0.418929 (Hartree/Particle)  
Thermal correction to Energy= 0.446954  
Thermal correction to Enthalpy= 0.447898  
Thermal correction to Gibbs Free Energy= 0.358220  
Sum of electronic and zero-point Energies= -1640.476633  
Sum of electronic and thermal Energies= -1640.448608  
Sum of electronic and thermal Enthalpies= -1640.447664  
Sum of electronic and thermal Free Energies= -1640.537342
